# Supplementary material for: Highly sensitive CD40L protein discrimination via label-free fiber sensing technologies
Source: Royal Society of Chemistry journal article supplement (doi:10.1039/d4an00867g), 2024-01-01
Supplement: d4an00867g1.zip [file d4an00867g1.zip]

## Sheet: Sheet1
Wavelength	0.5μg/mL+Serum	1.5μg/mL+Serum	0.0μg/mL+Serum
1600	-20.0922	-20.3678	-19.4797
1600.04	-20.0816	-20.3612	-19.4656
1600.08	-20.0703	-20.361	-19.4584
1600.12	-20.0685	-20.3603	-19.4456
1600.16	-20.0684	-20.3557	-19.4343
1600.2	-20.0651	-20.3526	-19.4215
1600.24	-20.0609	-20.3469	-19.4134
1600.28	-20.0541	-20.3385	-19.3997
1600.32	-20.0459	-20.3412	-19.3882
1600.36	-20.0389	-20.335	-19.3727
1600.4	-20.0373	-20.3358	-19.3651
1600.44	-20.0335	-20.337	-19.3576
1600.48	-20.0289	-20.3334	-19.3442
1600.52	-20.0354	-20.3337	-19.3329
1600.56	-20.0273	-20.3277	-19.3189
1600.6	-20.0204	-20.321	-19.3045
1600.64	-20.0142	-20.3156	-19.2886
1600.68	-20.0036	-20.3122	-19.2719
1600.72	-20.0013	-20.3102	-19.2569
1600.76	-19.9912	-20.3029	-19.2398
1600.8	-19.9786	-20.3001	-19.2249
1600.84	-19.9742	-20.2913	-19.2142
1600.88	-19.9698	-20.2868	-19.2028
1600.92	-19.9565	-20.2768	-19.1835
1600.96	-19.943	-20.2704	-19.1669
1601	-19.9394	-20.2599	-19.1555
1601.04	-19.9334	-20.2567	-19.1382
1601.08	-19.9269	-20.2503	-19.1229
1601.12	-19.919	-20.2469	-19.1096
1601.16	-19.9113	-20.2407	-19.0942
1601.2	-19.903	-20.2328	-19.0791
1601.24	-19.8955	-20.2287	-19.0644
1601.28	-19.8858	-20.2221	-19.0512
1601.32	-19.8782	-20.2163	-19.0385
1601.36	-19.8732	-20.2162	-19.0258
1601.4	-19.8655	-20.2107	-19.0115
1601.44	-19.8605	-20.2045	-18.9971
1601.48	-19.847	-20.198	-18.9804
1601.52	-19.8448	-20.2024	-18.9723
1601.56	-19.8377	-20.1963	-18.9621
1601.6	-19.8286	-20.1891	-18.9496
1601.64	-19.8221	-20.1752	-18.9329
1601.68	-19.8156	-20.1716	-18.9188
1601.72	-19.8107	-20.1714	-18.9057
1601.76	-19.8053	-20.1651	-18.8873
1601.8	-19.7986	-20.1557	-18.872
1601.84	-19.7885	-20.147	-18.8643
1601.88	-19.7793	-20.1393	-18.8495
1601.92	-19.7733	-20.1346	-18.837
1601.96	-19.7626	-20.1285	-18.8242
1602	-19.752	-20.1198	-18.8099
1602.04	-19.7443	-20.1154	-18.7972
1602.08	-19.7331	-20.1078	-18.7877
1602.12	-19.7229	-20.0996	-18.7755
1602.16	-19.7153	-20.087	-18.7625
1602.2	-19.707	-20.08	-18.7482
1602.24	-19.7036	-20.0649	-18.7293
1602.28	-19.6986	-20.0615	-18.7175
1602.32	-19.6788	-20.0491	-18.6975
1602.36	-19.6729	-20.0394	-18.6833
1602.4	-19.6629	-20.0296	-18.6696
1602.44	-19.6537	-20.0212	-18.6569
1602.48	-19.6444	-20.0123	-18.6438
1602.52	-19.6323	-20.0035	-18.6332
1602.56	-19.6256	-19.9936	-18.6224
1602.6	-19.6194	-19.9932	-18.6155
1602.64	-19.6076	-19.9822	-18.6016
1602.68	-19.5975	-19.9717	-18.5876
1602.72	-19.587	-19.9638	-18.5803
1602.76	-19.5759	-19.952	-18.5614
1602.8	-19.5681	-19.9441	-18.5547
1602.84	-19.5506	-19.9285	-18.539
1602.88	-19.5384	-19.9193	-18.5279
1602.92	-19.5259	-19.9099	-18.5169
1602.96	-19.5123	-19.8993	-18.501
1603	-19.5021	-19.8875	-18.4893
1603.04	-19.488	-19.874	-18.4725
1603.08	-19.4737	-19.8634	-18.463
1603.12	-19.4574	-19.8474	-18.4474
1603.16	-19.446	-19.8337	-18.4338
1603.2	-19.4365	-19.8223	-18.4226
1603.24	-19.4205	-19.8074	-18.4045
1603.28	-19.4115	-19.7971	-18.3933
1603.32	-19.3981	-19.7865	-18.3823
1603.36	-19.3824	-19.7705	-18.3672
1603.4	-19.3636	-19.7576	-18.3491
1603.44	-19.3544	-19.7456	-18.3397
1603.48	-19.3353	-19.7245	-18.3222
1603.52	-19.3258	-19.7156	-18.3125
1603.56	-19.3175	-19.6945	-18.302
1603.6	-19.3054	-19.6793	-18.2901
1603.64	-19.2989	-19.6588	-18.2868
1603.68	-19.2857	-19.6489	-18.2815
1603.72	-19.2757	-19.6372	-18.2726
1603.76	-19.2655	-19.624	-18.2615
1603.8	-19.2497	-19.6106	-18.2525
1603.84	-19.2388	-19.5992	-18.2423
1603.88	-19.2245	-19.5865	-18.2317
1603.92	-19.2178	-19.5764	-18.2242
1603.96	-19.2114	-19.57	-18.2171
1604	-19.2018	-19.5598	-18.2106
1604.04	-19.1904	-19.5514	-18.2033
1604.08	-19.1777	-19.5403	-18.1965
1604.12	-19.1712	-19.5323	-18.1901
1604.16	-19.1633	-19.5173	-18.1811
1604.2	-19.1513	-19.5076	-18.1735
1604.24	-19.1433	-19.4959	-18.1633
1604.28	-19.1377	-19.4901	-18.1547
1604.32	-19.1312	-19.4827	-18.1335
1604.36	-19.1218	-19.4758	-18.1268
1604.4	-19.1144	-19.4675	-18.1213
1604.44	-19.1027	-19.4704	-18.1132
1604.48	-19.0899	-19.4586	-18.1085
1604.52	-19.0796	-19.4478	-18.101
1604.56	-19.0697	-19.4361	-18.0918
1604.6	-19.0614	-19.4245	-18.0779
1604.64	-19.0566	-19.4196	-18.077
1604.68	-19.0448	-19.4141	-18.0664
1604.72	-19.0313	-19.4067	-18.0608
1604.76	-19.0251	-19.4033	-18.064
1604.8	-19.0154	-19.3927	-18.0577
1604.84	-19.0035	-19.3835	-18.0604
1604.88	-18.9972	-19.3839	-18.0552
1604.92	-18.9893	-19.3694	-18.0474
1604.96	-18.9808	-19.3561	-18.0415
1605	-18.9663	-19.3429	-18.0289
1605.04	-18.9556	-19.3349	-18.022
1605.08	-18.9399	-19.3237	-18.0108
1605.12	-18.9244	-19.3124	-18.0024
1605.16	-18.914	-19.3058	-17.9941
1605.2	-18.9036	-19.2963	-17.9907
1605.24	-18.8902	-19.2863	-17.9759
1605.28	-18.8781	-19.2687	-17.9668
1605.32	-18.8696	-19.266	-17.9655
1605.36	-18.8576	-19.2579	-17.9577
1605.4	-18.8495	-19.2512	-17.9546
1605.44	-18.8378	-19.2358	-17.9449
1605.48	-18.8235	-19.2253	-17.9368
1605.52	-18.806	-19.2116	-17.9232
1605.56	-18.8018	-19.2048	-17.917
1605.6	-18.7917	-19.1964	-17.9113
1605.64	-18.7818	-19.1919	-17.908
1605.68	-18.7694	-19.1832	-17.8992
1605.72	-18.757	-19.1715	-17.8898
1605.76	-18.7447	-19.1645	-17.8879
1605.8	-18.7428	-19.1611	-17.8846
1605.84	-18.7293	-19.148	-17.8766
1605.88	-18.7155	-19.1346	-17.8651
1605.92	-18.7014	-19.1213	-17.8564
1605.96	-18.6922	-19.1079	-17.8421
1606	-18.6717	-19.0967	-17.8284
1606.04	-18.6597	-19.0821	-17.8181
1606.08	-18.653	-19.074	-17.8138
1606.12	-18.6527	-19.0606	-17.8025
1606.16	-18.6386	-19.0473	-17.7958
1606.2	-18.6277	-19.0384	-17.7933
1606.24	-18.6111	-19.0231	-17.7881
1606.28	-18.5966	-19.0111	-17.7779
1606.32	-18.5928	-19.0153	-17.7755
1606.36	-18.5805	-19.0034	-17.7681
1606.4	-18.5792	-18.9976	-17.7716
1606.44	-18.562	-18.9838	-17.7625
1606.48	-18.5441	-18.9651	-17.7458
1606.52	-18.5288	-18.9471	-17.7329
1606.56	-18.515	-18.9347	-17.7236
1606.6	-18.5007	-18.9209	-17.7118
1606.64	-18.4853	-18.9105	-17.7059
1606.68	-18.4691	-18.8962	-17.7014
1606.72	-18.4568	-18.8853	-17.6928
1606.76	-18.4429	-18.8758	-17.6899
1606.8	-18.4316	-18.8643	-17.6879
1606.84	-18.4212	-18.8512	-17.6719
1606.88	-18.4114	-18.846	-17.6681
1606.92	-18.3961	-18.8304	-17.6584
1606.96	-18.3858	-18.817	-17.6508
1607	-18.3808	-18.8053	-17.6467
1607.04	-18.3717	-18.7994	-17.6408
1607.08	-18.3621	-18.7887	-17.6406
1607.12	-18.3503	-18.7781	-17.6333
1607.16	-18.3374	-18.7667	-17.627
1607.2	-18.3246	-18.7517	-17.62
1607.24	-18.3103	-18.7406	-17.612
1607.28	-18.2957	-18.7298	-17.6066
1607.32	-18.2884	-18.7136	-17.5955
1607.36	-18.2711	-18.6978	-17.5858
1607.4	-18.2567	-18.6841	-17.5777
1607.44	-18.2492	-18.6741	-17.5726
1607.48	-18.2491	-18.6688	-17.5734
1607.52	-18.2477	-18.6596	-17.5699
1607.56	-18.2344	-18.6431	-17.5577
1607.6	-18.2262	-18.6363	-17.551
1607.64	-18.2165	-18.6274	-17.5458
1607.68	-18.2074	-18.6265	-17.5417
1607.72	-18.2005	-18.6172	-17.5337
1607.76	-18.1849	-18.5998	-17.5272
1607.8	-18.1821	-18.5941	-17.5276
1607.84	-18.1737	-18.5873	-17.527
1607.88	-18.1657	-18.5792	-17.5197
1607.92	-18.1579	-18.5698	-17.5143
1607.96	-18.1492	-18.5588	-17.5123
1608	-18.1382	-18.5461	-17.5043
1608.04	-18.1309	-18.5329	-17.4995
1608.08	-18.1217	-18.5189	-17.4964
1608.12	-18.1148	-18.5108	-17.4905
1608.16	-18.1066	-18.5009	-17.4811
1608.2	-18.0987	-18.4963	-17.4772
1608.24	-18.0902	-18.4866	-17.4714
1608.28	-18.0817	-18.4828	-17.4721
1608.32	-18.0728	-18.4738	-17.4602
1608.36	-18.0697	-18.4633	-17.4561
1608.4	-18.0643	-18.4558	-17.4553
1608.44	-18.0572	-18.4435	-17.4524
1608.48	-18.0486	-18.4328	-17.4481
1608.52	-18.0406	-18.4216	-17.4436
1608.56	-18.0453	-18.4178	-17.4456
1608.6	-18.0356	-18.4073	-17.4335
1608.64	-18.0249	-18.3898	-17.4244
1608.68	-18.018	-18.3795	-17.4227
1608.72	-18.0065	-18.369	-17.4211
1608.76	-18.0011	-18.3627	-17.4163
1608.8	-17.9937	-18.3542	-17.4228
1608.84	-17.9873	-18.3466	-17.4165
1608.88	-17.9791	-18.3347	-17.4148
1608.92	-17.9671	-18.3268	-17.4115
1608.96	-17.9628	-18.32	-17.4094
1609	-17.9583	-18.31	-17.4111
1609.04	-17.9537	-18.302	-17.4086
1609.08	-17.9504	-18.2935	-17.41
1609.12	-17.9516	-18.2803	-17.4085
1609.16	-17.9509	-18.2771	-17.4092
1609.2	-17.9468	-18.27	-17.4066
1609.24	-17.9453	-18.2623	-17.4099
1609.28	-17.9401	-18.2589	-17.4129
1609.32	-17.9341	-18.2528	-17.4126
1609.36	-17.9313	-18.2454	-17.4112
1609.4	-17.93	-18.2403	-17.415
1609.44	-17.933	-18.2329	-17.4205
1609.48	-17.9297	-18.2252	-17.42
1609.52	-17.9326	-18.2278	-17.4217
1609.56	-17.9308	-18.2218	-17.4213
1609.6	-17.9252	-18.2224	-17.4211
1609.64	-17.9186	-18.2233	-17.4275
1609.68	-17.9104	-18.2271	-17.4281
1609.72	-17.9093	-18.2228	-17.4323
1609.76	-17.9072	-18.2175	-17.4294
1609.8	-17.9049	-18.2154	-17.435
1609.84	-17.9056	-18.2103	-17.4364
1609.88	-17.9056	-18.2068	-17.4396
1609.92	-17.9073	-18.205	-17.442
1609.96	-17.9061	-18.1996	-17.4382
1610	-17.905	-18.1954	-17.4371
1610.04	-17.906	-18.1903	-17.4402
1610.08	-17.903	-18.1841	-17.4377
1610.12	-17.9032	-18.1782	-17.4363
1610.16	-17.8997	-18.1715	-17.4348
1610.2	-17.8979	-18.1745	-17.4361
1610.24	-17.9002	-18.1732	-17.4429
1610.28	-17.8978	-18.169	-17.4449
1610.32	-17.8942	-18.1604	-17.4413
1610.36	-17.8921	-18.1545	-17.4568
1610.4	-17.8879	-18.15	-17.4575
1610.44	-17.8849	-18.1438	-17.4543
1610.48	-17.8831	-18.1395	-17.4543
1610.52	-17.8781	-18.1367	-17.4561
1610.56	-17.8747	-18.135	-17.4559
1610.6	-17.8784	-18.14	-17.4637
1610.64	-17.8791	-18.1429	-17.4709
1610.68	-17.8753	-18.1369	-17.4661
1610.72	-17.8843	-18.1428	-17.479
1610.76	-17.8876	-18.1375	-17.4798
1610.8	-17.8848	-18.1311	-17.4812
1610.84	-17.886	-18.1335	-17.4894
1610.88	-17.8891	-18.1344	-17.4926
1610.92	-17.8847	-18.1261	-17.4964
1610.96	-17.8842	-18.1292	-17.4996
1611	-17.8807	-18.1264	-17.5037
1611.04	-17.8805	-18.1232	-17.5104
1611.08	-17.8805	-18.1217	-17.5103
1611.12	-17.8821	-18.1174	-17.5111
1611.16	-17.887	-18.111	-17.5196
1611.2	-17.8875	-18.1069	-17.5275
1611.24	-17.8896	-18.1073	-17.5326
1611.28	-17.8869	-18.1027	-17.5411
1611.32	-17.8855	-18.1071	-17.546
1611.36	-17.882	-18.1043	-17.5474
1611.4	-17.8835	-18.1003	-17.5556
1611.44	-17.8887	-18.1055	-17.5663
1611.48	-17.8887	-18.1074	-17.5749
1611.52	-17.8878	-18.1022	-17.5796
1611.56	-17.8885	-18.1037	-17.5873
1611.6	-17.8849	-18.1009	-17.5922
1611.64	-17.8847	-18.0994	-17.5985
1611.68	-17.877	-18.0895	-17.5983
1611.72	-17.8731	-18.0873	-17.6044
1611.76	-17.8685	-18.0868	-17.6091
1611.8	-17.8699	-18.0835	-17.612
1611.84	-17.8634	-18.0764	-17.6172
1611.88	-17.8642	-18.0751	-17.6243
1611.92	-17.8618	-18.0715	-17.6287
1611.96	-17.8654	-18.0726	-17.6366
1612	-17.8649	-18.0719	-17.6497
1612.04	-17.8666	-18.071	-17.6561
1612.08	-17.8666	-18.0728	-17.6683
1612.12	-17.8665	-18.0694	-17.6745
1612.16	-17.8656	-18.0619	-17.6819
1612.2	-17.8652	-18.0581	-17.6898
1612.24	-17.8634	-18.0528	-17.6927
1612.28	-17.8658	-18.0523	-17.6967
1612.32	-17.8676	-18.054	-17.7067
1612.36	-17.8595	-18.0417	-17.7088
1612.4	-17.8612	-18.041	-17.7193
1612.44	-17.8492	-18.0314	-17.7204
1612.48	-17.8493	-18.0294	-17.726
1612.52	-17.852	-18.0302	-17.7364
1612.56	-17.8521	-18.0307	-17.7432
1612.6	-17.85	-18.0274	-17.7503
1612.64	-17.851	-18.0293	-17.7638
1612.68	-17.8528	-18.0285	-17.77
1612.72	-17.8552	-18.0306	-17.7767
1612.76	-17.8563	-18.029	-17.7858
1612.8	-17.8585	-18.0238	-17.7925
1612.84	-17.8597	-18.0224	-17.7997
1612.88	-17.868	-18.0232	-17.8168
1612.92	-17.8666	-18.0147	-17.8209
1612.96	-17.8708	-18.0181	-17.8286
1613	-17.8727	-18.0211	-17.8333
1613.04	-17.8733	-18.0219	-17.8403
1613.08	-17.8757	-18.0237	-17.8495
1613.12	-17.8779	-18.0243	-17.8571
1613.16	-17.8748	-18.0274	-17.8667
1613.2	-17.882	-18.0282	-17.8739
1613.24	-17.8845	-18.03	-17.8827
1613.28	-17.89	-18.0331	-17.8937
1613.32	-17.8981	-18.0312	-17.9025
1613.36	-17.9049	-18.0399	-17.9107
1613.4	-17.9203	-18.0527	-17.9259
1613.44	-17.9324	-18.0649	-17.9444
1613.48	-17.9384	-18.0679	-17.9517
1613.52	-17.9346	-18.066	-17.9491
1613.56	-17.9362	-18.0625	-17.9563
1613.6	-17.9418	-18.0641	-17.9642
1613.64	-17.9509	-18.0665	-17.9748
1613.68	-17.9632	-18.0747	-17.9868
1613.72	-17.9673	-18.0766	-17.9936
1613.76	-17.9682	-18.076	-18.0002
1613.8	-17.9767	-18.0803	-18.0037
1613.84	-17.9819	-18.0824	-18.0077
1613.88	-17.9902	-18.0841	-18.0162
1613.92	-17.9974	-18.0914	-18.027
1613.96	-18.0034	-18.0951	-18.0346
1614	-18.0071	-18.0963	-18.0409
1614.04	-18.0157	-18.1001	-18.0488
1614.08	-18.0243	-18.107	-18.055
1614.12	-18.0294	-18.1133	-18.0579
1614.16	-18.0352	-18.1179	-18.0654
1614.2	-18.041	-18.1205	-18.0754
1614.24	-18.044	-18.1234	-18.0823
1614.28	-18.0545	-18.1322	-18.0946
1614.32	-18.0616	-18.1349	-18.0985
1614.36	-18.0585	-18.1347	-18.1077
1614.4	-18.0655	-18.1412	-18.1166
1614.44	-18.0682	-18.1435	-18.1191
1614.48	-18.0749	-18.153	-18.1252
1614.52	-18.0802	-18.1579	-18.131
1614.56	-18.0884	-18.1684	-18.1411
1614.6	-18.0889	-18.1711	-18.1418
1614.64	-18.0982	-18.179	-18.1526
1614.68	-18.1023	-18.1891	-18.1579
1614.72	-18.1086	-18.1971	-18.1591
1614.76	-18.1201	-18.2041	-18.1592
1614.8	-18.127	-18.2022	-18.1655
1614.84	-18.1342	-18.2101	-18.1697
1614.88	-18.1368	-18.2057	-18.1742
1614.92	-18.1471	-18.2151	-18.1779
1614.96	-18.1666	-18.2299	-18.1914
1615	-18.1751	-18.2357	-18.1933
1615.04	-18.1838	-18.2422	-18.1979
1615.08	-18.1898	-18.2502	-18.1995
1615.12	-18.1951	-18.2539	-18.1943
1615.16	-18.2016	-18.2688	-18.1956
1615.2	-18.2142	-18.281	-18.2055
1615.24	-18.2215	-18.2907	-18.2111
1615.28	-18.2256	-18.3029	-18.2145
1615.32	-18.2348	-18.3093	-18.2212
1615.36	-18.2439	-18.3171	-18.2242
1615.4	-18.2527	-18.3273	-18.2301
1615.44	-18.2498	-18.3311	-18.2315
1615.48	-18.257	-18.3407	-18.2339
1615.52	-18.2638	-18.3499	-18.2375
1615.56	-18.2655	-18.3533	-18.239
1615.6	-18.2719	-18.3627	-18.2405
1615.64	-18.2804	-18.3716	-18.2438
1615.68	-18.2934	-18.3798	-18.2429
1615.72	-18.3067	-18.3919	-18.2494
1615.76	-18.318	-18.4014	-18.2529
1615.8	-18.3271	-18.412	-18.2534
1615.84	-18.3404	-18.4216	-18.2626
1615.88	-18.351	-18.4294	-18.2667
1615.92	-18.359	-18.4362	-18.2704
1615.96	-18.3619	-18.4433	-18.2691
1616	-18.369	-18.4507	-18.2761
1616.04	-18.3768	-18.4608	-18.2782
1616.08	-18.3819	-18.4721	-18.2803
1616.12	-18.3882	-18.4776	-18.2832
1616.16	-18.394	-18.4794	-18.2855
1616.2	-18.3986	-18.4855	-18.2874
1616.24	-18.4055	-18.4936	-18.2881
1616.28	-18.411	-18.5022	-18.2867
1616.32	-18.4181	-18.5129	-18.2864
1616.36	-18.4246	-18.5208	-18.2932
1616.4	-18.4361	-18.5331	-18.2992
1616.44	-18.444	-18.5402	-18.3016
1616.48	-18.4548	-18.5496	-18.313
1616.52	-18.4627	-18.5582	-18.3176
1616.56	-18.4765	-18.5689	-18.3252
1616.6	-18.4832	-18.5774	-18.3303
1616.64	-18.4859	-18.5726	-18.3316
1616.68	-18.492	-18.5758	-18.3374
1616.72	-18.4981	-18.5847	-18.3477
1616.76	-18.4973	-18.5839	-18.3469
1616.8	-18.5008	-18.5897	-18.3495
1616.84	-18.5057	-18.5971	-18.3524
1616.88	-18.5076	-18.5991	-18.3504
1616.92	-18.5124	-18.6042	-18.3583
1616.96	-18.5153	-18.6101	-18.3629
1617	-18.5215	-18.6168	-18.3688
1617.04	-18.5232	-18.6264	-18.374
1617.08	-18.5275	-18.6316	-18.38
1617.12	-18.5327	-18.6393	-18.3949
1617.16	-18.5348	-18.6468	-18.4069
1617.2	-18.5389	-18.6572	-18.4105
1617.24	-18.5427	-18.6647	-18.4121
1617.28	-18.5463	-18.6724	-18.4195
1617.32	-18.5529	-18.6813	-18.4304
1617.36	-18.5585	-18.686	-18.4363
1617.4	-18.5619	-18.6888	-18.4399
1617.44	-18.5653	-18.6942	-18.4479
1617.48	-18.5596	-18.6918	-18.4486
1617.52	-18.5621	-18.6991	-18.4496
1617.56	-18.5662	-18.7022	-18.4595
1617.6	-18.5679	-18.7054	-18.4686
1617.64	-18.5725	-18.7107	-18.4791
1617.68	-18.5769	-18.7171	-18.4908
1617.72	-18.5844	-18.727	-18.5035
1617.76	-18.5909	-18.7311	-18.5146
1617.8	-18.5991	-18.7362	-18.5286
1617.84	-18.6037	-18.7427	-18.5387
1617.88	-18.6054	-18.7366	-18.5448
1617.92	-18.6051	-18.7374	-18.5551
1617.96	-18.6115	-18.7412	-18.5699
1618	-18.6223	-18.7469	-18.5879
1618.04	-18.6254	-18.7373	-18.596
1618.08	-18.6282	-18.7405	-18.6068
1618.12	-18.6321	-18.7457	-18.6137
1618.16	-18.6334	-18.748	-18.6233
1618.2	-18.635	-18.7558	-18.6323
1618.24	-18.6308	-18.7615	-18.6407
1618.28	-18.6348	-18.7653	-18.6536
1618.32	-18.6413	-18.7652	-18.6701
1618.36	-18.6459	-18.7686	-18.6776
1618.4	-18.6496	-18.7646	-18.6894
1618.44	-18.6555	-18.7694	-18.6983
1618.48	-18.6579	-18.7764	-18.7026
1618.52	-18.6657	-18.7821	-18.7161
1618.56	-18.6682	-18.7879	-18.7299
1618.6	-18.6742	-18.799	-18.7481
1618.64	-18.6792	-18.8042	-18.7625
1618.68	-18.6862	-18.8121	-18.7754
1618.72	-18.6932	-18.814	-18.7912
1618.76	-18.7011	-18.8185	-18.8075
1618.8	-18.7022	-18.8159	-18.8139
1618.84	-18.7125	-18.8266	-18.8283
1618.88	-18.7159	-18.8315	-18.8416
1618.92	-18.7211	-18.8351	-18.8535
1618.96	-18.7325	-18.8464	-18.8694
1619	-18.7396	-18.8537	-18.8843
1619.04	-18.7474	-18.8593	-18.903
1619.08	-18.7566	-18.8675	-18.9184
1619.12	-18.7617	-18.8738	-18.9316
1619.16	-18.7677	-18.8786	-18.9429
1619.2	-18.7769	-18.8841	-18.9549
1619.24	-18.7866	-18.8821	-18.9684
1619.28	-18.7971	-18.8925	-18.9822
1619.32	-18.8095	-18.9017	-18.9968
1619.36	-18.818	-18.9129	-19.005
1619.4	-18.827	-18.9195	-19.024
1619.44	-18.8355	-18.9264	-19.0372
1619.48	-18.8439	-18.9289	-19.0439
1619.52	-18.8543	-18.936	-19.0597
1619.56	-18.8711	-18.9409	-19.0737
1619.6	-18.8871	-18.965	-19.0947
1619.64	-18.9012	-18.9812	-19.11
1619.68	-18.9058	-18.9872	-19.1172
1619.72	-18.911	-18.9902	-19.1188
1619.76	-18.9269	-19.0017	-19.129
1619.8	-18.9408	-19.014	-19.144
1619.84	-18.9553	-19.0266	-19.1616
1619.88	-18.968	-19.037	-19.177
1619.92	-18.9764	-19.0463	-19.1848
1619.96	-18.9867	-19.0511	-19.1917
1620	-18.9968	-19.0603	-19.2023
1620.04	-19.0098	-19.0701	-19.2156
1620.08	-19.0133	-19.0789	-19.2215
1620.12	-19.0206	-19.0872	-19.2315
1620.16	-19.0321	-19.097	-19.2447
1620.2	-19.0493	-19.1116	-19.2612
1620.24	-19.051	-19.1233	-19.2688
1620.28	-19.0668	-19.1356	-19.2766
1620.32	-19.0691	-19.1415	-19.2818
1620.36	-19.0809	-19.1514	-19.2896
1620.4	-19.1013	-19.163	-19.3016
1620.44	-19.1162	-19.17	-19.3105
1620.48	-19.1357	-19.1855	-19.3257
1620.52	-19.1482	-19.1976	-19.333
1620.56	-19.1669	-19.2137	-19.3472
1620.6	-19.1779	-19.2208	-19.3516
1620.64	-19.1933	-19.2309	-19.3597
1620.68	-19.2028	-19.2405	-19.3701
1620.72	-19.2179	-19.2504	-19.3788
1620.76	-19.2339	-19.2624	-19.388
1620.8	-19.2463	-19.2738	-19.3989
1620.84	-19.2593	-19.2855	-19.4066
1620.88	-19.2721	-19.2969	-19.4129
1620.92	-19.2844	-19.3168	-19.4117
1620.96	-19.2955	-19.3288	-19.4201
1621	-19.2979	-19.3315	-19.4198
1621.04	-19.3091	-19.3441	-19.4256
1621.08	-19.3228	-19.3594	-19.4292
1621.12	-19.3351	-19.3706	-19.4313
1621.16	-19.3492	-19.3896	-19.4471
1621.2	-19.3628	-19.4009	-19.4551
1621.24	-19.3694	-19.4084	-19.4567
1621.28	-19.3779	-19.418	-19.4631
1621.32	-19.3903	-19.4244	-19.4657
1621.36	-19.4005	-19.4358	-19.4701
1621.4	-19.4095	-19.4458	-19.4757
1621.44	-19.4158	-19.4553	-19.4774
1621.48	-19.4383	-19.4695	-19.484
1621.52	-19.4556	-19.4807	-19.4934
1621.56	-19.4724	-19.4973	-19.5013
1621.6	-19.483	-19.5082	-19.5072
1621.64	-19.4971	-19.5188	-19.515
1621.68	-19.5078	-19.5307	-19.5184
1621.72	-19.5201	-19.5465	-19.5283
1621.76	-19.531	-19.5538	-19.5289
1621.8	-19.5414	-19.5608	-19.5296
1621.84	-19.5537	-19.5629	-19.5368
1621.88	-19.5553	-19.5683	-19.5339
1621.92	-19.5698	-19.5872	-19.5347
1621.96	-19.5819	-19.6001	-19.5361
1622	-19.5969	-19.6121	-19.5434
1622.04	-19.6048	-19.6217	-19.545
1622.08	-19.6112	-19.6202	-19.5466
1622.12	-19.6187	-19.6266	-19.5393
1622.16	-19.6322	-19.6399	-19.5443
1622.2	-19.6431	-19.658	-19.549
1622.24	-19.6478	-19.6674	-19.5504
1622.28	-19.6469	-19.6782	-19.553
1622.32	-19.6557	-19.6841	-19.5539
1622.36	-19.669	-19.6958	-19.563
1622.4	-19.6777	-19.7026	-19.5629
1622.44	-19.6814	-19.7086	-19.5617
1622.48	-19.6907	-19.7138	-19.5653
1622.52	-19.6946	-19.7179	-19.5621
1622.56	-19.6949	-19.7244	-19.56
1622.6	-19.6997	-19.7309	-19.5606
1622.64	-19.7046	-19.7368	-19.5595
1622.68	-19.7102	-19.7505	-19.5587
1622.72	-19.7145	-19.7593	-19.556
1622.76	-19.7231	-19.7629	-19.5589
1622.8	-19.7278	-19.763	-19.5574
1622.84	-19.7327	-19.7694	-19.5618
1622.88	-19.7374	-19.7715	-19.5626
1622.92	-19.7417	-19.7745	-19.5635
1622.96	-19.7448	-19.7787	-19.5613
1623	-19.7487	-19.7817	-19.5595
1623.04	-19.7511	-19.7779	-19.5611
1623.08	-19.7619	-19.7829	-19.5624
1623.12	-19.76	-19.7869	-19.5594
1623.16	-19.7623	-19.7911	-19.5555
1623.2	-19.7693	-19.7964	-19.5514
1623.24	-19.7731	-19.7955	-19.5497
1623.28	-19.7762	-19.7999	-19.5506
1623.32	-19.7787	-19.8025	-19.5485
1623.36	-19.7803	-19.8022	-19.5468
1623.4	-19.7794	-19.8037	-19.5466
1623.44	-19.7816	-19.8056	-19.5484
1623.48	-19.7858	-19.8128	-19.5499
1623.52	-19.7898	-19.8163	-19.5512
1623.56	-19.7953	-19.8147	-19.56
1623.6	-19.7971	-19.8218	-19.5594
1623.64	-19.8019	-19.8253	-19.5607
1623.68	-19.8022	-19.8242	-19.5577
1623.72	-19.8079	-19.83	-19.561
1623.76	-19.8144	-19.8362	-19.5659
1623.8	-19.8169	-19.8382	-19.5657
1623.84	-19.8195	-19.8378	-19.5658
1623.88	-19.8095	-19.8321	-19.565
1623.92	-19.8089	-19.8383	-19.5617
1623.96	-19.8164	-19.8434	-19.5599
1624	-19.8172	-19.8444	-19.5589
1624.04	-19.8104	-19.8404	-19.5477
1624.08	-19.8123	-19.8502	-19.5466
1624.12	-19.8098	-19.8482	-19.5455
1624.16	-19.8077	-19.8464	-19.548
1624.2	-19.8086	-19.8481	-19.549
1624.24	-19.8101	-19.8479	-19.549
1624.28	-19.8103	-19.8459	-19.5467
1624.32	-19.8124	-19.8437	-19.5391
1624.36	-19.8107	-19.8463	-19.536
1624.4	-19.8086	-19.8468	-19.5403
1624.44	-19.8088	-19.8555	-19.5408
1624.48	-19.8087	-19.8544	-19.5423
1624.52	-19.8183	-19.8574	-19.5492
1624.56	-19.8178	-19.8573	-19.5457
1624.6	-19.8168	-19.8572	-19.5452
1624.64	-19.8182	-19.8559	-19.5426
1624.68	-19.8209	-19.8527	-19.543
1624.72	-19.8255	-19.8568	-19.5487
1624.76	-19.8235	-19.8596	-19.5453
1624.8	-19.8251	-19.8581	-19.5453
1624.84	-19.8295	-19.8645	-19.5496
1624.88	-19.828	-19.862	-19.5474
1624.92	-19.8346	-19.8642	-19.5462
1624.96	-19.834	-19.8657	-19.5461
1625	-19.8296	-19.8657	-19.5432
1625.04	-19.8297	-19.8669	-19.5432
1625.08	-19.8304	-19.8658	-19.5414
1625.12	-19.826	-19.8651	-19.5382
1625.16	-19.8277	-19.8649	-19.5349
1625.2	-19.8254	-19.8646	-19.5337
1625.24	-19.8285	-19.8609	-19.5305
1625.28	-19.8288	-19.8666	-19.5281
1625.32	-19.8257	-19.8688	-19.5215
1625.36	-19.8227	-19.8667	-19.5194
1625.4	-19.8285	-19.8668	-19.5233
1625.44	-19.834	-19.8748	-19.5249
1625.48	-19.8352	-19.8755	-19.5237
1625.52	-19.8368	-19.873	-19.5148
1625.56	-19.8382	-19.8719	-19.5122
1625.6	-19.8381	-19.8776	-19.5083
1625.64	-19.8382	-19.875	-19.5008
1625.68	-19.8375	-19.8672	-19.4979
1625.72	-19.8422	-19.8648	-19.4962
1625.76	-19.8436	-19.8675	-19.5006
1625.8	-19.8422	-19.8656	-19.5011
1625.84	-19.8401	-19.8663	-19.4984
1625.88	-19.8327	-19.8635	-19.4918
1625.92	-19.8248	-19.8604	-19.4851
1625.96	-19.8278	-19.8637	-19.4843
1626	-19.8273	-19.8675	-19.4831
1626.04	-19.8289	-19.8723	-19.4842
1626.08	-19.8281	-19.8746	-19.4797
1626.12	-19.839	-19.8795	-19.4818
1626.16	-19.8433	-19.8808	-19.4801
1626.2	-19.8437	-19.882	-19.4755
1626.24	-19.8381	-19.8792	-19.4657
1626.28	-19.8483	-19.8779	-19.461
1626.32	-19.848	-19.8779	-19.4584
1626.36	-19.8533	-19.8764	-19.4538
1626.4	-19.853	-19.8782	-19.4532
1626.44	-19.8518	-19.8792	-19.4441
1626.48	-19.8504	-19.8821	-19.4396
1626.52	-19.8454	-19.8777	-19.4276
1626.56	-19.8465	-19.8781	-19.4224
1626.6	-19.8419	-19.8751	-19.4058
1626.64	-19.8413	-19.8779	-19.3994
1626.68	-19.8391	-19.8781	-19.3928
1626.72	-19.8419	-19.8765	-19.3863
1626.76	-19.842	-19.8747	-19.3767
1626.8	-19.8376	-19.8676	-19.3694
1626.84	-19.8353	-19.8645	-19.3635
1626.88	-19.8311	-19.8697	-19.3572
1626.92	-19.8314	-19.8713	-19.3497
1626.96	-19.8368	-19.876	-19.3583
1627	-19.8387	-19.8798	-19.351
1627.04	-19.8413	-19.8817	-19.3428
1627.08	-19.8403	-19.8816	-19.3351
1627.12	-19.8335	-19.8806	-19.3279
1627.16	-19.834	-19.8788	-19.3288
1627.2	-19.8287	-19.8765	-19.321
1627.24	-19.825	-19.8753	-19.3161
1627.28	-19.8145	-19.8743	-19.3081
1627.32	-19.8217	-19.8749	-19.3052
1627.36	-19.817	-19.8713	-19.2993
1627.4	-19.8168	-19.8724	-19.295
1627.44	-19.8169	-19.873	-19.2817
1627.48	-19.8206	-19.8681	-19.2742
1627.52	-19.8196	-19.8711	-19.2644
1627.56	-19.8149	-19.8718	-19.2506
1627.6	-19.8041	-19.867	-19.2385
1627.64	-19.8048	-19.867	-19.2273
1627.68	-19.7996	-19.8666	-19.2129
1627.72	-19.7983	-19.8692	-19.2022
1627.76	-19.7928	-19.8625	-19.1899
1627.8	-19.7882	-19.8607	-19.1819
1627.84	-19.79	-19.8672	-19.1816
1627.88	-19.7849	-19.8687	-19.1739
1627.92	-19.7864	-19.8713	-19.1657
1627.96	-19.7764	-19.8646	-19.1568
1628	-19.7649	-19.8598	-19.1457
1628.04	-19.7611	-19.8533	-19.1353
1628.08	-19.7579	-19.8517	-19.1264
1628.12	-19.7561	-19.8616	-19.1222
1628.16	-19.7517	-19.8631	-19.1228
1628.2	-19.7379	-19.8607	-19.1111
1628.24	-19.7294	-19.8549	-19.0994
1628.28	-19.7274	-19.8511	-19.0894
1628.32	-19.732	-19.8496	-19.0852
1628.36	-19.7203	-19.846	-19.0721
1628.4	-19.7077	-19.8389	-19.0569
1628.44	-19.6976	-19.8349	-19.0448
1628.48	-19.6922	-19.8313	-19.035
1628.52	-19.6899	-19.8316	-19.0302
1628.56	-19.6825	-19.833	-19.0217
1628.6	-19.6856	-19.8329	-19.0187
1628.64	-19.6748	-19.8241	-19.0006
1628.68	-19.6661	-19.8173	-18.987
1628.72	-19.6582	-19.8095	-18.971
1628.76	-19.6555	-19.8052	-18.9661
1628.8	-19.6409	-19.7977	-18.9505
1628.84	-19.6328	-19.7981	-18.9408
1628.88	-19.6255	-19.7921	-18.9263
1628.92	-19.6156	-19.789	-18.9114
1628.96	-19.6051	-19.7852	-18.9008
1629	-19.5937	-19.7779	-18.8892
1629.04	-19.5878	-19.774	-18.8812
1629.08	-19.5756	-19.7721	-18.8636
1629.12	-19.5611	-19.7641	-18.8502
1629.16	-19.5566	-19.7591	-18.841
1629.2	-19.5476	-19.747	-18.8297
1629.24	-19.5439	-19.7456	-18.828
1629.28	-19.5352	-19.7424	-18.8192
1629.32	-19.5269	-19.733	-18.8123
1629.36	-19.5171	-19.7266	-18.8044
1629.4	-19.5089	-19.7152	-18.7919
1629.44	-19.501	-19.7083	-18.7811
1629.48	-19.4936	-19.6976	-18.7771
1629.52	-19.4804	-19.6888	-18.7669
1629.56	-19.4691	-19.6783	-18.7547
1629.6	-19.453	-19.6697	-18.7428
1629.64	-19.4399	-19.6612	-18.732
1629.68	-19.4262	-19.6518	-18.7225
1629.72	-19.4143	-19.6448	-18.7111
1629.76	-19.3958	-19.6284	-18.6933
1629.8	-19.3798	-19.6162	-18.6818
1629.84	-19.3675	-19.6011	-18.672
1629.88	-19.3542	-19.5917	-18.6638
1629.92	-19.3511	-19.5782	-18.6566
1629.96	-19.3432	-19.5673	-18.652
1630	-19.3333	-19.5553	-18.6436
1630.04	-19.3217	-19.5465	-18.6342
1630.08	-19.3103	-19.538	-18.6294
1630.12	-19.2939	-19.5305	-18.618
1630.16	-19.2823	-19.5201	-18.608
1630.2	-19.2727	-19.5086	-18.6022
1630.24	-19.2606	-19.4972	-18.5951
1630.28	-19.2511	-19.4877	-18.5896
1630.32	-19.2487	-19.481	-18.5852
1630.36	-19.2391	-19.4772	-18.5843
1630.4	-19.2301	-19.4736	-18.5788
1630.44	-19.2225	-19.4652	-18.572
1630.48	-19.2127	-19.4546	-18.5641
1630.52	-19.2019	-19.4446	-18.5594
1630.56	-19.1865	-19.4338	-18.552
1630.6	-19.173	-19.427	-18.5489
1630.64	-19.1634	-19.4194	-18.5446
1630.68	-19.1535	-19.412	-18.5419
1630.72	-19.1452	-19.4096	-18.5316
1630.76	-19.1329	-19.3966	-18.5208
1630.8	-19.1272	-19.3888	-18.5169
1630.84	-19.1156	-19.381	-18.5087
1630.88	-19.1051	-19.3754	-18.5044
1630.92	-19.0944	-19.3681	-18.4988
1630.96	-19.0862	-19.3613	-18.4948
1631	-19.0788	-19.3559	-18.4922
1631.04	-19.0653	-19.3435	-18.488
1631.08	-19.0577	-19.3348	-18.4819
1631.12	-19.0487	-19.3312	-18.4798
1631.16	-19.0473	-19.3273	-18.4735
1631.2	-19.0408	-19.3176	-18.4699
1631.24	-19.0368	-19.3106	-18.4695
1631.28	-19.0343	-19.3104	-18.4696
1631.32	-19.0291	-19.3048	-18.4689
1631.36	-19.0283	-19.2977	-18.4699
1631.4	-19.0291	-19.2963	-18.4635
1631.44	-19.02	-19.2912	-18.4585
1631.48	-19.0132	-19.2819	-18.4535
1631.52	-19.0021	-19.2703	-18.4461
1631.56	-18.9967	-19.2655	-18.4488
1631.6	-18.9971	-19.2706	-18.4532
1631.64	-18.9935	-19.2651	-18.4559
1631.68	-18.987	-19.2541	-18.448
1631.72	-18.9811	-19.252	-18.4458
1631.76	-18.9747	-19.2541	-18.4454
1631.8	-18.9771	-19.2564	-18.4482
1631.84	-18.9709	-19.2534	-18.4444
1631.88	-18.9598	-19.2484	-18.4388
1631.92	-18.966	-19.2511	-18.4408
1631.96	-18.9641	-19.2423	-18.4299
1632	-18.9565	-19.2358	-18.4256
1632.04	-18.9526	-19.2297	-18.4199
1632.08	-18.9476	-19.221	-18.4136
1632.12	-18.9422	-19.2157	-18.4077
1632.16	-18.935	-19.2078	-18.4038
1632.2	-18.9297	-19.2074	-18.4005
1632.24	-18.9221	-19.2025	-18.3922
1632.28	-18.9185	-19.1973	-18.3907
1632.32	-18.9121	-19.1901	-18.3878
1632.36	-18.8984	-19.1833	-18.3838
1632.4	-18.8922	-19.1791	-18.3763
1632.44	-18.8884	-19.1724	-18.3694
1632.48	-18.8862	-19.1675	-18.3694
1632.52	-18.8819	-19.1624	-18.3668
1632.56	-18.8789	-19.1583	-18.3654
1632.6	-18.8732	-19.1524	-18.3618
1632.64	-18.8695	-19.1459	-18.3644
1632.68	-18.8658	-19.136	-18.3627
1632.72	-18.8594	-19.13	-18.3596
1632.76	-18.8568	-19.1259	-18.3592
1632.8	-18.8561	-19.1251	-18.3628
1632.84	-18.8466	-19.1238	-18.3624
1632.88	-18.8399	-19.1221	-18.3577
1632.92	-18.8383	-19.1174	-18.3542
1632.96	-18.8352	-19.1126	-18.3556
1633	-18.8248	-19.1037	-18.3473
1633.04	-18.8197	-19.0987	-18.341
1633.08	-18.8169	-19.1001	-18.3445
1633.12	-18.8138	-19.0973	-18.3444
1633.16	-18.8134	-19.0923	-18.3401
1633.2	-18.8077	-19.0903	-18.3365
1633.24	-18.8063	-19.0888	-18.3345
1633.28	-18.8027	-19.0855	-18.3311
1633.32	-18.8074	-19.0815	-18.3284
1633.36	-18.8006	-19.0795	-18.3224
1633.4	-18.7992	-19.079	-18.3195
1633.44	-18.7988	-19.0762	-18.3145
1633.48	-18.7963	-19.0726	-18.318
1633.52	-18.7917	-19.0739	-18.3171
1633.56	-18.7943	-19.0747	-18.3245
1633.6	-18.791	-19.0689	-18.3246
1633.64	-18.7924	-19.0653	-18.3184
1633.68	-18.7904	-19.0642	-18.3204
1633.72	-18.7879	-19.0635	-18.3254
1633.76	-18.7913	-19.0694	-18.3356
1633.8	-18.7888	-19.0609	-18.3345
1633.84	-18.7917	-19.0635	-18.3371
1633.88	-18.7784	-19.054	-18.328
1633.92	-18.7725	-19.0489	-18.3235
1633.96	-18.7657	-19.0388	-18.3197
1634	-18.7653	-19.0377	-18.3114
1634.04	-18.7667	-19.0358	-18.3122
1634.08	-18.7595	-19.0344	-18.3088
1634.12	-18.756	-19.0307	-18.3031
1634.16	-18.7542	-19.0287	-18.3028
1634.2	-18.7476	-19.0194	-18.2935
1634.24	-18.7471	-19.0134	-18.2864
1634.28	-18.739	-19.0077	-18.2835
1634.32	-18.7295	-19.0048	-18.2805
1634.36	-18.7267	-19.0039	-18.2792
1634.4	-18.73	-19.0032	-18.2819
1634.44	-18.7264	-18.9949	-18.2786
1634.48	-18.7234	-18.9882	-18.276
1634.52	-18.7188	-18.9809	-18.2707
1634.56	-18.7065	-18.9703	-18.2586
1634.6	-18.7106	-18.9707	-18.2541
1634.64	-18.7021	-18.9642	-18.2479
1634.68	-18.6956	-18.9557	-18.2483
1634.72	-18.6935	-18.9464	-18.2411
1634.76	-18.6887	-18.9386	-18.2405
1634.8	-18.6776	-18.9283	-18.2304
1634.84	-18.6749	-18.9231	-18.226
1634.88	-18.671	-18.9166	-18.2239
1634.92	-18.6667	-18.908	-18.224
1634.96	-18.6667	-18.9026	-18.229
1635	-18.6654	-18.8975	-18.223
1635.04	-18.6649	-18.8938	-18.2223
1635.08	-18.6544	-18.8819	-18.2151
1635.12	-18.6526	-18.878	-18.2205
1635.16	-18.6543	-18.8746	-18.2228
1635.2	-18.6485	-18.8659	-18.2192
1635.24	-18.6473	-18.8632	-18.2189
1635.28	-18.6353	-18.8486	-18.2077
1635.32	-18.6345	-18.846	-18.21
1635.36	-18.6296	-18.8403	-18.2083
1635.4	-18.623	-18.83	-18.2034
1635.44	-18.6168	-18.8282	-18.204
1635.48	-18.6067	-18.8221	-18.2036
1635.52	-18.5969	-18.8175	-18.1985
1635.56	-18.5914	-18.8089	-18.1948
1635.6	-18.587	-18.7999	-18.1936
1635.64	-18.5875	-18.7979	-18.1945
1635.68	-18.5851	-18.7904	-18.1918
1635.72	-18.5814	-18.783	-18.1873
1635.76	-18.5761	-18.7791	-18.1886
1635.8	-18.5741	-18.7721	-18.1887
1635.84	-18.5651	-18.7623	-18.1802
1635.88	-18.5604	-18.7584	-18.1727
1635.92	-18.5543	-18.7544	-18.1687
1635.96	-18.5493	-18.7531	-18.1662
1636	-18.5446	-18.7489	-18.1612
1636.04	-18.5388	-18.745	-18.1583
1636.08	-18.5335	-18.7354	-18.1552
1636.12	-18.5305	-18.7325	-18.1524
1636.16	-18.5307	-18.7272	-18.1526
1636.2	-18.5315	-18.7272	-18.1547
1636.24	-18.5289	-18.7193	-18.1503
1636.28	-18.5261	-18.7143	-18.1418
1636.32	-18.5232	-18.7132	-18.1295
1636.36	-18.5163	-18.7085	-18.1291
1636.4	-18.5162	-18.7047	-18.1345
1636.44	-18.5092	-18.7039	-18.1359
1636.48	-18.5076	-18.7012	-18.1349
1636.52	-18.5001	-18.6958	-18.1375
1636.56	-18.4966	-18.6952	-18.1279
1636.6	-18.4948	-18.6902	-18.1222
1636.64	-18.5024	-18.6912	-18.1234
1636.68	-18.5045	-18.6924	-18.1257
1636.72	-18.5036	-18.6882	-18.1224
1636.76	-18.5002	-18.6842	-18.1215
1636.8	-18.4923	-18.679	-18.1187
1636.84	-18.4896	-18.675	-18.1141
1636.88	-18.495	-18.681	-18.1192
1636.92	-18.4953	-18.6772	-18.1146
1636.96	-18.498	-18.6774	-18.1144
1637	-18.4968	-18.6726	-18.1115
1637.04	-18.4943	-18.6664	-18.1061
1637.08	-18.5	-18.6697	-18.1048
1637.12	-18.4986	-18.6648	-18.0984
1637.16	-18.5006	-18.6542	-18.0935
1637.2	-18.4937	-18.6445	-18.0864
1637.24	-18.4909	-18.6437	-18.0758
1637.28	-18.4911	-18.6446	-18.071
1637.32	-18.4869	-18.632	-18.065
1637.36	-18.4843	-18.631	-18.0587
1637.4	-18.481	-18.6288	-18.0492
1637.44	-18.4756	-18.6262	-18.0485
1637.48	-18.4726	-18.6258	-18.0476
1637.52	-18.4649	-18.6231	-18.0429
1637.56	-18.4701	-18.6278	-18.0426
1637.6	-18.4661	-18.627	-18.0375
1637.64	-18.4576	-18.6163	-18.0239
1637.68	-18.4528	-18.6129	-18.0188
1637.72	-18.4546	-18.6144	-18.0195
1637.76	-18.4562	-18.6176	-18.0146
1637.8	-18.4531	-18.6168	-18.0068
1637.84	-18.4428	-18.6064	-17.9923
1637.88	-18.4415	-18.6048	-17.987
1637.92	-18.4475	-18.6026	-17.9828
1637.96	-18.437	-18.5927	-17.9693
1638	-18.4359	-18.5966	-17.9723
1638.04	-18.4337	-18.5967	-17.97
1638.08	-18.428	-18.5932	-17.9657
1638.12	-18.4272	-18.5928	-17.9605
1638.16	-18.4128	-18.5854	-17.9515
1638.2	-18.4092	-18.5813	-17.9431
1638.24	-18.4075	-18.5769	-17.9379
1638.28	-18.403	-18.5718	-17.9358
1638.32	-18.3964	-18.5631	-17.9214
1638.36	-18.395	-18.563	-17.9173
1638.4	-18.4039	-18.5582	-17.9121
1638.44	-18.4041	-18.5545	-17.9093
1638.48	-18.4006	-18.5469	-17.905
1638.52	-18.3971	-18.5364	-17.8954
1638.56	-18.3968	-18.5354	-17.8917
1638.6	-18.3941	-18.5339	-17.8879
1638.64	-18.3893	-18.5293	-17.8825
1638.68	-18.3837	-18.5245	-17.874
1638.72	-18.3719	-18.5249	-17.8685
1638.76	-18.3696	-18.5225	-17.8616
1638.8	-18.3635	-18.518	-17.8534
1638.84	-18.3559	-18.5103	-17.8409
1638.88	-18.3586	-18.5064	-17.8277
1638.92	-18.351	-18.502	-17.8141
1638.96	-18.3527	-18.5007	-17.8132
1639	-18.3519	-18.4955	-17.8076
1639.04	-18.3507	-18.4941	-17.7976
1639.08	-18.3483	-18.4921	-17.7917
1639.12	-18.3439	-18.483	-17.7808
1639.16	-18.3405	-18.4797	-17.7712
1639.2	-18.3322	-18.4786	-17.7703
1639.24	-18.3313	-18.4714	-17.7637
1639.28	-18.3265	-18.4671	-17.7463
1639.32	-18.325	-18.4546	-17.7396
1639.36	-18.3238	-18.4531	-17.7311
1639.4	-18.3222	-18.4516	-17.7265
1639.44	-18.3187	-18.4507	-17.7243
1639.48	-18.3134	-18.4463	-17.722
1639.52	-18.3102	-18.4442	-17.7178
1639.56	-18.3082	-18.4417	-17.7142
1639.6	-18.3002	-18.4365	-17.7013
1639.64	-18.2988	-18.4394	-17.6991
1639.68	-18.2943	-18.4377	-17.7007
1639.72	-18.2939	-18.44	-17.6982
1639.76	-18.291	-18.4394	-17.6897
1639.8	-18.284	-18.4298	-17.6816
1639.84	-18.2839	-18.4368	-17.6793
1639.88	-18.2772	-18.4309	-17.6709
1639.92	-18.2799	-18.4305	-17.6701
1639.96	-18.274	-18.4324	-17.6674
1640	-18.2747	-18.4299	-17.6654
1640.04	-18.2701	-18.425	-17.6628
1640.08	-18.2668	-18.4245	-17.6554
1640.12	-18.2646	-18.4183	-17.6495
1640.16	-18.2617	-18.4194	-17.6506
1640.2	-18.2486	-18.4125	-17.6401
1640.24	-18.2513	-18.4084	-17.6444
1640.28	-18.2497	-18.408	-17.6475
1640.32	-18.247	-18.3981	-17.6448
1640.36	-18.2468	-18.3953	-17.6445
1640.4	-18.2426	-18.3919	-17.6379
1640.44	-18.2333	-18.388	-17.6307
1640.48	-18.2319	-18.3899	-17.6287
1640.52	-18.2293	-18.3881	-17.627
1640.56	-18.2262	-18.388	-17.6257
1640.6	-18.2255	-18.3904	-17.6228
1640.64	-18.2117	-18.3792	-17.6174
1640.68	-18.2055	-18.3724	-17.6119
1640.72	-18.2053	-18.3735	-17.6092
1640.76	-18.1976	-18.3624	-17.6132
1640.8	-18.1935	-18.3636	-17.6135
1640.84	-18.191	-18.365	-17.6134
1640.88	-18.1856	-18.3653	-17.6116
1640.92	-18.1785	-18.3639	-17.6079
1640.96	-18.1722	-18.3645	-17.6036
1641	-18.1625	-18.3638	-17.5975
1641.04	-18.1539	-18.359	-17.5959
1641.08	-18.1431	-18.3565	-17.5934
1641.12	-18.1379	-18.3567	-17.5915
1641.16	-18.1312	-18.3551	-17.5884
1641.2	-18.118	-18.3514	-17.5821
1641.24	-18.1165	-18.3444	-17.5794
1641.28	-18.1111	-18.3419	-17.5746
1641.32	-18.109	-18.3411	-17.5713
1641.36	-18.1021	-18.3372	-17.5626
1641.4	-18.0972	-18.3353	-17.5574
1641.44	-18.0936	-18.3337	-17.5538
1641.48	-18.0877	-18.3322	-17.5495
1641.52	-18.0929	-18.3336	-17.5501
1641.56	-18.093	-18.3316	-17.5471
1641.6	-18.0919	-18.3316	-17.5434
1641.64	-18.0896	-18.3345	-17.5415
1641.68	-18.0827	-18.3323	-17.5326
1641.72	-18.0792	-18.3321	-17.53
1641.76	-18.0766	-18.3317	-17.5282
1641.8	-18.0773	-18.3306	-17.5264
1641.84	-18.0732	-18.3297	-17.5209
1641.88	-18.0736	-18.3262	-17.5164
1641.92	-18.0667	-18.3267	-17.5162
1641.96	-18.0686	-18.3258	-17.5172
1642	-18.0696	-18.3265	-17.5158
1642.04	-18.0695	-18.3271	-17.5114
1642.08	-18.0714	-18.3243	-17.5145
1642.12	-18.0704	-18.3268	-17.5105
1642.16	-18.066	-18.3229	-17.5051
1642.2	-18.0594	-18.3257	-17.5049
1642.24	-18.0659	-18.3324	-17.5032
1642.28	-18.0585	-18.3375	-17.499
1642.32	-18.0577	-18.3414	-17.4986
1642.36	-18.0556	-18.3398	-17.5034
1642.4	-18.0554	-18.3394	-17.5004
1642.44	-18.0515	-18.3399	-17.4937
1642.48	-18.0525	-18.3341	-17.4862
1642.52	-18.0472	-18.3323	-17.4789
1642.56	-18.0517	-18.3378	-17.4739
1642.6	-18.0539	-18.3361	-17.4741
1642.64	-18.0538	-18.3375	-17.4733
1642.68	-18.0484	-18.3326	-17.4671
1642.72	-18.0452	-18.3256	-17.4509
1642.76	-18.0394	-18.3248	-17.4426
1642.8	-18.0378	-18.3218	-17.4412
1642.84	-18.0406	-18.3175	-17.4357
1642.88	-18.0362	-18.3162	-17.4343
1642.92	-18.0282	-18.3093	-17.4259
1642.96	-18.027	-18.3065	-17.4256
1643	-18.0229	-18.3006	-17.4177
1643.04	-18.023	-18.3027	-17.4163
1643.08	-18.0194	-18.2998	-17.4105
1643.12	-18.0154	-18.2955	-17.4049
1643.16	-18.0119	-18.29	-17.4034
1643.2	-18.0053	-18.2909	-17.3967
1643.24	-18.003	-18.2906	-17.396
1643.28	-17.9984	-18.2879	-17.398
1643.32	-17.9899	-18.2838	-17.3929
1643.36	-17.9862	-18.2881	-17.3837
1643.4	-17.9851	-18.2943	-17.3828
1643.44	-17.9845	-18.2915	-17.3863
1643.48	-17.9775	-18.288	-17.3816
1643.52	-17.9754	-18.2827	-17.3766
1643.56	-17.9765	-18.2749	-17.37
1643.6	-17.9721	-18.2674	-17.3645
1643.64	-17.9721	-18.264	-17.3619
1643.68	-17.97	-18.2624	-17.3597
1643.72	-17.9645	-18.2587	-17.3498
1643.76	-17.9554	-18.253	-17.3404
1643.8	-17.9415	-18.2405	-17.3331
1643.84	-17.9368	-18.2362	-17.333
1643.88	-17.9348	-18.2346	-17.3312
1643.92	-17.9277	-18.23	-17.3259
1643.96	-17.9179	-18.2219	-17.3199
1644	-17.9109	-18.213	-17.3146
1644.04	-17.9016	-18.2013	-17.3065
1644.08	-17.8964	-18.1883	-17.3027
1644.12	-17.8888	-18.1798	-17.2978
1644.16	-17.8773	-18.1656	-17.29
1644.2	-17.8807	-18.1605	-17.282
1644.24	-17.8757	-18.1531	-17.2767
1644.28	-17.8637	-18.1428	-17.2714
1644.32	-17.8602	-18.1304	-17.264
1644.36	-17.8591	-18.1257	-17.2705
1644.4	-17.8514	-18.1153	-17.2676
1644.44	-17.8399	-18.1068	-17.263
1644.48	-17.8316	-18.0968	-17.263
1644.52	-17.8238	-18.0876	-17.2595
1644.56	-17.8098	-18.0863	-17.2629
1644.6	-17.7982	-18.0749	-17.2584
1644.64	-17.7883	-18.0621	-17.2526
1644.68	-17.778	-18.0469	-17.2501
1644.72	-17.771	-18.039	-17.2494
1644.76	-17.7717	-18.0265	-17.2466
1644.8	-17.7669	-18.0173	-17.2443
1644.84	-17.76	-18.0087	-17.2444
1644.88	-17.7517	-17.9968	-17.2466
1644.92	-17.7432	-17.9901	-17.2441
1644.96	-17.7466	-17.9852	-17.2538
1645	-17.7352	-17.9763	-17.252
1645.04	-17.7264	-17.9714	-17.2476
1645.08	-17.723	-17.9638	-17.2576
1645.12	-17.7147	-17.9539	-17.2621
1645.16	-17.7091	-17.9439	-17.2682
1645.2	-17.7059	-17.9375	-17.2782
1645.24	-17.7037	-17.9263	-17.2773
1645.28	-17.6969	-17.9246	-17.2834
1645.32	-17.6912	-17.9145	-17.3018
1645.36	-17.6869	-17.9185	-17.3148
1645.4	-17.6757	-17.9065	-17.3243
1645.44	-17.668	-17.8962	-17.3266
1645.48	-17.6649	-17.8885	-17.3328
1645.52	-17.6582	-17.8825	-17.3373
1645.56	-17.6554	-17.8784	-17.345
1645.6	-17.647	-17.8728	-17.3524
1645.64	-17.6417	-17.8653	-17.3617
1645.68	-17.6377	-17.8577	-17.3696
1645.72	-17.6386	-17.8547	-17.3798
1645.76	-17.6325	-17.8435	-17.3829
1645.8	-17.6285	-17.8336	-17.394
1645.84	-17.6213	-17.8231	-17.3961
1645.88	-17.614	-17.8129	-17.4039
1645.92	-17.6102	-17.8041	-17.4121
1645.96	-17.6061	-17.795	-17.4173
1646	-17.6068	-17.7835	-17.4271
1646.04	-17.6	-17.7821	-17.4367
1646.08	-17.5972	-17.7773	-17.4478
1646.12	-17.596	-17.7689	-17.4595
1646.16	-17.5958	-17.7697	-17.4747
1646.2	-17.5959	-17.7615	-17.4879
1646.24	-17.597	-17.7571	-17.4995
1646.28	-17.5919	-17.7554	-17.508
1646.32	-17.5894	-17.7487	-17.5156
1646.36	-17.5918	-17.7549	-17.5265
1646.4	-17.5935	-17.751	-17.5388
1646.44	-17.5913	-17.745	-17.5492
1646.48	-17.5953	-17.7405	-17.5639
1646.52	-17.5941	-17.7372	-17.5752
1646.56	-17.5867	-17.7355	-17.587
1646.6	-17.5917	-17.7375	-17.6035
1646.64	-17.6051	-17.7468	-17.6285
1646.68	-17.6075	-17.7474	-17.6401
1646.72	-17.6097	-17.744	-17.6511
1646.76	-17.619	-17.7531	-17.6717
1646.8	-17.6268	-17.767	-17.6827
1646.84	-17.6286	-17.7684	-17.6902
1646.88	-17.6316	-17.7689	-17.7027
1646.92	-17.6351	-17.768	-17.7159
1646.96	-17.6405	-17.7692	-17.728
1647	-17.6441	-17.7699	-17.7346
1647.04	-17.6448	-17.7687	-17.7444
1647.08	-17.6557	-17.7765	-17.7604
1647.12	-17.6657	-17.779	-17.7704
1647.16	-17.6758	-17.7819	-17.7851
1647.2	-17.6833	-17.7828	-17.7953
1647.24	-17.6982	-17.7874	-17.8096
1647.28	-17.7043	-17.7926	-17.8213
1647.32	-17.7101	-17.7962	-17.8328
1647.36	-17.7147	-17.7969	-17.8457
1647.4	-17.7199	-17.7958	-17.8587
1647.44	-17.7265	-17.7988	-17.8712
1647.48	-17.7305	-17.8048	-17.8855
1647.52	-17.7417	-17.8121	-17.8973
1647.56	-17.7448	-17.8151	-17.9053
1647.6	-17.7504	-17.82	-17.9156
1647.64	-17.7517	-17.823	-17.9275
1647.68	-17.7724	-17.8421	-17.9501
1647.72	-17.7863	-17.8522	-17.9682
1647.76	-17.7915	-17.856	-17.9767
1647.8	-17.8113	-17.8726	-17.9986
1647.84	-17.8124	-17.8678	-18.0033
1647.88	-17.8159	-17.8699	-18.0112
1647.92	-17.8227	-17.8774	-18.0241
1647.96	-17.8374	-17.8846	-18.0366
1648	-17.8424	-17.8866	-18.0395
1648.04	-17.8476	-17.8908	-18.0427
1648.08	-17.8545	-17.8962	-18.0528
1648.12	-17.8574	-17.9026	-18.0568
1648.16	-17.8635	-17.9112	-18.0679
1648.2	-17.8709	-17.917	-18.0755
1648.24	-17.8867	-17.9245	-18.0837
1648.28	-17.8837	-17.9177	-18.0873
1648.32	-17.8939	-17.9234	-18.0959
1648.36	-17.9019	-17.929	-18.1042
1648.4	-17.9149	-17.9417	-18.1183
1648.44	-17.9233	-17.9456	-18.1249
1648.48	-17.9286	-17.9485	-18.1316
1648.52	-17.9361	-17.9525	-18.138
1648.56	-17.946	-17.9582	-18.1413
1648.6	-17.954	-17.9613	-18.1467
1648.64	-17.9658	-17.9681	-18.16
1648.68	-17.9846	-17.9864	-18.1767
1648.72	-17.9916	-17.9893	-18.1824
1648.76	-18.0001	-17.9967	-18.1906
1648.8	-18.0108	-18.0023	-18.2012
1648.84	-18.0178	-18.0086	-18.2071
1648.88	-18.0277	-18.0175	-18.2178
1648.92	-18.0391	-18.0225	-18.2253
1648.96	-18.0471	-18.028	-18.2306
1649	-18.0557	-18.0345	-18.2388
1649.04	-18.06	-18.0407	-18.2468
1649.08	-18.0634	-18.0439	-18.249
1649.12	-18.0707	-18.0518	-18.2508
1649.16	-18.0784	-18.0597	-18.254
1649.2	-18.0888	-18.0702	-18.2617
1649.24	-18.0963	-18.0794	-18.2671
1649.28	-18.1038	-18.0918	-18.2764
1649.32	-18.1125	-18.1	-18.2793
1649.36	-18.1201	-18.106	-18.2842
1649.4	-18.1292	-18.1105	-18.2958
1649.44	-18.1316	-18.111	-18.3017
1649.48	-18.1378	-18.1193	-18.3043
1649.52	-18.1502	-18.1271	-18.3117
1649.56	-18.1585	-18.134	-18.3178
1649.6	-18.171	-18.1498	-18.3306
1649.64	-18.1786	-18.1572	-18.3344
1649.68	-18.1836	-18.1623	-18.3386
1649.72	-18.1887	-18.1693	-18.3411
1649.76	-18.1988	-18.1781	-18.3546
1649.8	-18.2064	-18.1863	-18.359
1649.84	-18.2188	-18.1976	-18.3573
1649.88	-18.2271	-18.1976	-18.3585
1649.92	-18.2316	-18.2014	-18.3649
1649.96	-18.2387	-18.2063	-18.3718
1650	-18.2466	-18.2135	-18.3723
1650.04	-18.2554	-18.2237	-18.3792
1650.08	-18.2637	-18.2317	-18.3877
1650.12	-18.2679	-18.2407	-18.3919
1650.16	-18.2772	-18.2481	-18.3981
1650.2	-18.2869	-18.2604	-18.4049
1650.24	-18.2953	-18.2706	-18.4193
1650.28	-18.2999	-18.2779	-18.4303
1650.32	-18.3075	-18.2811	-18.4373
1650.36	-18.3151	-18.2928	-18.4514
1650.4	-18.315	-18.2961	-18.455
1650.44	-18.3205	-18.3017	-18.4621
1650.48	-18.3267	-18.3091	-18.4695
1650.52	-18.332	-18.3161	-18.4749
1650.56	-18.335	-18.3285	-18.4858
1650.6	-18.3478	-18.3359	-18.4934
1650.64	-18.3634	-18.3508	-18.5114
1650.68	-18.3702	-18.3606	-18.5198
1650.72	-18.3805	-18.3739	-18.525
1650.76	-18.384	-18.3832	-18.5321
1650.8	-18.3938	-18.4004	-18.547
1650.84	-18.4001	-18.4083	-18.5556
1650.88	-18.4046	-18.4164	-18.565
1650.92	-18.4072	-18.428	-18.5715
1650.96	-18.4142	-18.4352	-18.5886
1651	-18.4211	-18.4419	-18.602
1651.04	-18.4313	-18.4521	-18.6139
1651.08	-18.4379	-18.4581	-18.6285
1651.12	-18.4398	-18.462	-18.6349
1651.16	-18.4525	-18.4739	-18.6511
1651.2	-18.4599	-18.4836	-18.6605
1651.24	-18.4646	-18.4922	-18.6624
1651.28	-18.4692	-18.5017	-18.6785
1651.32	-18.4775	-18.5075	-18.6894
1651.36	-18.4838	-18.5151	-18.6998
1651.4	-18.4834	-18.5192	-18.7044
1651.44	-18.4986	-18.532	-18.7139
1651.48	-18.5082	-18.5378	-18.7285
1651.52	-18.5155	-18.5464	-18.7412
1651.56	-18.5285	-18.556	-18.7542
1651.6	-18.5379	-18.5629	-18.7673
1651.64	-18.5545	-18.575	-18.785
1651.68	-18.5665	-18.584	-18.7923
1651.72	-18.5772	-18.5918	-18.8049
1651.76	-18.5864	-18.5977	-18.8138
1651.8	-18.5974	-18.6058	-18.8306
1651.84	-18.6091	-18.6171	-18.8483
1651.88	-18.6232	-18.629	-18.8672
1651.92	-18.6334	-18.638	-18.8807
1651.96	-18.6459	-18.6447	-18.8942
1652	-18.6582	-18.6542	-18.9057
1652.04	-18.6693	-18.6678	-18.917
1652.08	-18.692	-18.6867	-18.9375
1652.12	-18.7092	-18.7013	-18.9596
1652.16	-18.7221	-18.7098	-18.9768
1652.2	-18.7275	-18.7181	-18.9909
1652.24	-18.7367	-18.7304	-19.0034
1652.28	-18.7489	-18.7353	-19.0195
1652.32	-18.7579	-18.7484	-19.0347
1652.36	-18.7707	-18.7582	-19.0543
1652.4	-18.7798	-18.7665	-19.0693
1652.44	-18.7905	-18.7803	-19.0851
1652.48	-18.8038	-18.7945	-19.1046
1652.52	-18.8137	-18.8069	-19.1167
1652.56	-18.8264	-18.8184	-19.1331
1652.6	-18.8466	-18.8315	-19.1504
1652.64	-18.8576	-18.8409	-19.1656
1652.68	-18.8562	-18.8442	-19.1726
1652.72	-18.8624	-18.85	-19.1886
1652.76	-18.8742	-18.8641	-19.2072
1652.8	-18.8797	-18.8664	-19.2164
1652.84	-18.8895	-18.8753	-19.233
1652.88	-18.8979	-18.8833	-19.2544
1652.92	-18.9027	-18.8914	-19.2707
1652.96	-18.9149	-18.9028	-19.284
1653	-18.9234	-18.9114	-19.2994
1653.04	-18.9336	-18.9209	-19.3223
1653.08	-18.9456	-18.9312	-19.3423
1653.12	-18.9542	-18.9344	-19.3587
1653.16	-18.9633	-18.9403	-19.3775
1653.2	-18.9714	-18.9456	-19.394
1653.24	-18.983	-18.9521	-19.4036
1653.28	-18.9981	-18.9635	-19.4206
1653.32	-19.0074	-18.977	-19.4406
1653.36	-19.0196	-18.9845	-19.4582
1653.4	-19.0328	-18.9926	-19.4788
1653.44	-19.0441	-19.0063	-19.4934
1653.48	-19.0525	-19.0182	-19.5139
1653.52	-19.0627	-19.0279	-19.5328
1653.56	-19.0722	-19.029	-19.5522
1653.6	-19.0844	-19.0409	-19.5721
1653.64	-19.0987	-19.0522	-19.5878
1653.68	-19.1188	-19.0625	-19.6091
1653.72	-19.1166	-19.0568	-19.6166
1653.76	-19.122	-19.0619	-19.6334
1653.8	-19.1331	-19.0677	-19.6563
1653.84	-19.1292	-19.0599	-19.6591
1653.88	-19.1447	-19.0714	-19.6809
1653.92	-19.1649	-19.0864	-19.7037
1653.96	-19.1788	-19.0922	-19.7242
1654	-19.1874	-19.0986	-19.7404
1654.04	-19.198	-19.1058	-19.763
1654.08	-19.2124	-19.1196	-19.7914
1654.12	-19.2255	-19.1271	-19.8124
1654.16	-19.2343	-19.1377	-19.8337
1654.2	-19.2471	-19.1494	-19.8522
1654.24	-19.2651	-19.1624	-19.8757
1654.28	-19.2767	-19.1676	-19.8903
1654.32	-19.2944	-19.1832	-19.9155
1654.36	-19.3183	-19.1962	-19.9417
1654.4	-19.3303	-19.2027	-19.9625
1654.44	-19.337	-19.2065	-19.9766
1654.48	-19.3552	-19.221	-20.0005
1654.52	-19.3789	-19.2367	-20.027
1654.56	-19.3942	-19.2499	-20.0435
1654.6	-19.4106	-19.2612	-20.0704
1654.64	-19.4258	-19.2701	-20.0905
1654.68	-19.4344	-19.2786	-20.1041
1654.72	-19.4365	-19.2728	-20.1132
1654.76	-19.452	-19.2885	-20.1333
1654.8	-19.4667	-19.3003	-20.1579
1654.84	-19.4845	-19.3129	-20.1737
1654.88	-19.5026	-19.3255	-20.192
1654.92	-19.5157	-19.3367	-20.2094
1654.96	-19.531	-19.3543	-20.2282
1655	-19.5495	-19.3646	-20.2456
1655.04	-19.5656	-19.3793	-20.262
1655.08	-19.5802	-19.3929	-20.2792
1655.12	-19.5973	-19.4067	-20.2942
1655.16	-19.6229	-19.4286	-20.3256
1655.2	-19.6357	-19.4426	-20.3472
1655.24	-19.6506	-19.4447	-20.3607
1655.28	-19.6662	-19.4599	-20.3786
1655.32	-19.6838	-19.4706	-20.3935
1655.36	-19.7036	-19.4847	-20.4137
1655.4	-19.7206	-19.499	-20.431
1655.44	-19.7367	-19.521	-20.4474
1655.48	-19.7593	-19.5381	-20.4584
1655.52	-19.7775	-19.5511	-20.4746
1655.56	-19.7946	-19.5615	-20.4866
1655.6	-19.8144	-19.5805	-20.4998
1655.64	-19.8284	-19.5933	-20.5081
1655.68	-19.8499	-19.6145	-20.5254
1655.72	-19.869	-19.6288	-20.5376
1655.76	-19.8858	-19.6469	-20.5492
1655.8	-19.9093	-19.6696	-20.5611
1655.84	-19.9282	-19.6875	-20.5753
1655.88	-19.9468	-19.7071	-20.5945
1655.92	-19.9674	-19.7325	-20.6082
1655.96	-19.9784	-19.7498	-20.6164
1656	-19.9939	-19.7679	-20.6265
1656.04	-20.0118	-19.7871	-20.6431
1656.08	-20.0302	-19.805	-20.6515
1656.12	-20.0468	-19.8267	-20.6607
1656.16	-20.0654	-19.848	-20.6716
1656.2	-20.0864	-19.8696	-20.6847
1656.24	-20.1018	-19.8889	-20.6935
1656.28	-20.119	-19.9059	-20.7033
1656.32	-20.137	-19.9235	-20.7109
1656.36	-20.1588	-19.9497	-20.7221
1656.4	-20.1733	-19.9705	-20.7284
1656.44	-20.1947	-19.9917	-20.7372
1656.48	-20.213	-20.0143	-20.7449
1656.52	-20.2303	-20.0346	-20.753
1656.56	-20.2486	-20.0535	-20.7604
1656.6	-20.2707	-20.0728	-20.7609
1656.64	-20.2862	-20.0914	-20.764
1656.68	-20.2958	-20.1006	-20.7599
1656.72	-20.3079	-20.118	-20.7603
1656.76	-20.3217	-20.1361	-20.7622
1656.8	-20.341	-20.1533	-20.7644
1656.84	-20.3554	-20.1644	-20.7625
1656.88	-20.3712	-20.1816	-20.7641
1656.92	-20.3841	-20.201	-20.7593
1656.96	-20.4059	-20.2194	-20.7631
1657	-20.425	-20.2403	-20.7676
1657.04	-20.4416	-20.2593	-20.7699
1657.08	-20.4566	-20.2755	-20.7695
1657.12	-20.4731	-20.2914	-20.7709
1657.16	-20.4896	-20.3106	-20.7706
1657.2	-20.4972	-20.3264	-20.768
1657.24	-20.5059	-20.346	-20.7675
1657.28	-20.5175	-20.3599	-20.7731
1657.32	-20.5346	-20.3763	-20.7712
1657.36	-20.5543	-20.3971	-20.7767
1657.4	-20.5751	-20.4153	-20.7734
1657.44	-20.5856	-20.4308	-20.7742
1657.48	-20.5984	-20.4405	-20.7763
1657.52	-20.6121	-20.4618	-20.7771
1657.56	-20.634	-20.4843	-20.7815
1657.6	-20.6463	-20.499	-20.7798
1657.64	-20.6604	-20.5154	-20.7722
1657.68	-20.6708	-20.527	-20.7635
1657.72	-20.68	-20.5427	-20.7658
1657.76	-20.6903	-20.5469	-20.7615
1657.8	-20.7013	-20.5622	-20.7608
1657.84	-20.7201	-20.5879	-20.7655
1657.88	-20.7302	-20.5947	-20.7571
1657.92	-20.7393	-20.6074	-20.7514
1657.96	-20.752	-20.6198	-20.7457
1658	-20.7599	-20.636	-20.7415
1658.04	-20.7661	-20.6483	-20.7379
1658.08	-20.7727	-20.6608	-20.7339
1658.12	-20.7707	-20.6622	-20.716
1658.16	-20.7716	-20.6684	-20.7054
1658.2	-20.7741	-20.6813	-20.6948
1658.24	-20.7807	-20.688	-20.6879
1658.28	-20.7818	-20.6992	-20.6846
1658.32	-20.792	-20.7178	-20.6834
1658.36	-20.7949	-20.7253	-20.6757
1658.4	-20.7964	-20.7291	-20.667
1658.44	-20.8013	-20.7401	-20.6615
1658.48	-20.804	-20.7473	-20.653
1658.52	-20.8087	-20.7565	-20.6453
1658.56	-20.8113	-20.7645	-20.6384
1658.6	-20.8111	-20.7746	-20.6346
1658.64	-20.8049	-20.7827	-20.6284
1658.68	-20.8034	-20.7875	-20.6121
1658.72	-20.8048	-20.7877	-20.5984
1658.76	-20.8076	-20.8	-20.5944
1658.8	-20.8122	-20.8062	-20.5879
1658.84	-20.8147	-20.8088	-20.5822
1658.88	-20.8196	-20.8187	-20.5789
1658.92	-20.8224	-20.8238	-20.5696
1658.96	-20.8288	-20.828	-20.5511
1659	-20.8288	-20.8301	-20.5467
1659.04	-20.8297	-20.8321	-20.5402
1659.08	-20.8352	-20.839	-20.5322
1659.12	-20.8427	-20.8436	-20.5254
1659.16	-20.8392	-20.8462	-20.517
1659.2	-20.8388	-20.8479	-20.5089
1659.24	-20.8385	-20.8511	-20.501
1659.28	-20.8405	-20.8519	-20.5042
1659.32	-20.8323	-20.8475	-20.4978
1659.36	-20.8334	-20.8508	-20.4943
1659.4	-20.8283	-20.8503	-20.489
1659.44	-20.8237	-20.8541	-20.483
1659.48	-20.8209	-20.8526	-20.4714
1659.52	-20.8241	-20.8519	-20.469
1659.56	-20.8241	-20.848	-20.4618
1659.6	-20.8155	-20.8504	-20.4538
1659.64	-20.8173	-20.8479	-20.4488
1659.68	-20.8122	-20.8443	-20.4493
1659.72	-20.8081	-20.8427	-20.4444
1659.76	-20.8053	-20.8397	-20.4406
1659.8	-20.8005	-20.832	-20.4324
1659.84	-20.7966	-20.8291	-20.4255
1659.88	-20.7951	-20.83	-20.4221
1659.92	-20.7927	-20.8299	-20.417
1659.96	-20.7819	-20.8154	-20.4111
1660	-20.7746	-20.8174	-20.406
1660.04	-20.7751	-20.8195	-20.4067
1660.08	-20.7708	-20.8165	-20.4025
1660.12	-20.759	-20.8095	-20.394
1660.16	-20.7499	-20.8028	-20.3893
1660.2	-20.7483	-20.7987	-20.3814
1660.24	-20.7439	-20.7909	-20.3778
1660.28	-20.7343	-20.7832	-20.3723
1660.32	-20.7286	-20.7784	-20.3711
1660.36	-20.7218	-20.7696	-20.3642
1660.4	-20.712	-20.7636	-20.3576
1660.44	-20.7062	-20.7618	-20.3501
1660.48	-20.701	-20.7535	-20.3467
1660.52	-20.6937	-20.7461	-20.3414
1660.56	-20.68	-20.7334	-20.3255
1660.6	-20.6719	-20.7226	-20.3223
1660.64	-20.6669	-20.7137	-20.3176
1660.68	-20.6614	-20.7069	-20.3129
1660.72	-20.6595	-20.705	-20.3115
1660.76	-20.6607	-20.7104	-20.3115
1660.8	-20.6565	-20.7044	-20.3059
1660.84	-20.6506	-20.699	-20.3014
1660.88	-20.6438	-20.6936	-20.3009
1660.92	-20.6395	-20.6861	-20.3001
1660.96	-20.6382	-20.68	-20.298
1661	-20.6334	-20.673	-20.2885
1661.04	-20.6257	-20.6719	-20.2845
1661.08	-20.6204	-20.6684	-20.2772
1661.12	-20.6172	-20.6597	-20.2719
1661.16	-20.611	-20.6562	-20.2709
1661.2	-20.5988	-20.6445	-20.2589
1661.24	-20.598	-20.6312	-20.2536
1661.28	-20.5962	-20.6446	-20.2545
1661.32	-20.5942	-20.6457	-20.2526
1661.36	-20.5885	-20.6455	-20.2485
1661.4	-20.5806	-20.6458	-20.2436
1661.44	-20.5789	-20.6444	-20.2372
1661.48	-20.5763	-20.6399	-20.2323
1661.52	-20.5707	-20.6344	-20.2229
1661.56	-20.5714	-20.6407	-20.2226
1661.6	-20.5691	-20.6477	-20.2208
1661.64	-20.5583	-20.6484	-20.2197
1661.68	-20.5529	-20.6437	-20.2153
1661.72	-20.5491	-20.6476	-20.2099
1661.76	-20.5445	-20.6494	-20.2035
1661.8	-20.5459	-20.6478	-20.199
1661.84	-20.5372	-20.6374	-20.1929
1661.88	-20.5329	-20.6315	-20.1893
1661.92	-20.5297	-20.6275	-20.1852
1661.96	-20.5253	-20.6248	-20.1816
1662	-20.5302	-20.6274	-20.1806
1662.04	-20.5282	-20.6261	-20.1731
1662.08	-20.5294	-20.627	-20.1713
1662.12	-20.5251	-20.625	-20.1704
1662.16	-20.5217	-20.62	-20.1664
1662.2	-20.5136	-20.6163	-20.1588
1662.24	-20.5082	-20.6135	-20.1519
1662.28	-20.505	-20.6102	-20.1473
1662.32	-20.4993	-20.6088	-20.1375
1662.36	-20.4939	-20.6083	-20.1311
1662.4	-20.489	-20.6036	-20.1248
1662.44	-20.4869	-20.5982	-20.1206
1662.48	-20.4835	-20.5978	-20.1132
1662.52	-20.4787	-20.5932	-20.1062
1662.56	-20.477	-20.5911	-20.1014
1662.6	-20.4727	-20.5858	-20.0946
1662.64	-20.4671	-20.5785	-20.0921
1662.68	-20.4658	-20.5774	-20.0889
1662.72	-20.4649	-20.5805	-20.0855
1662.76	-20.4606	-20.579	-20.0821
1662.8	-20.4574	-20.5774	-20.0795
1662.84	-20.4603	-20.5827	-20.0849
1662.88	-20.4535	-20.5789	-20.0775
1662.92	-20.4465	-20.5747	-20.0743
1662.96	-20.4458	-20.5731	-20.0782
1663	-20.4457	-20.574	-20.0786
1663.04	-20.4414	-20.5658	-20.0726
1663.08	-20.435	-20.5608	-20.0646
1663.12	-20.4288	-20.5558	-20.0596
1663.16	-20.4238	-20.555	-20.0545
1663.2	-20.4176	-20.5465	-20.0472
1663.24	-20.4133	-20.5423	-20.0404
1663.28	-20.4112	-20.5341	-20.0312
1663.32	-20.4091	-20.528	-20.0278
1663.36	-20.4066	-20.5254	-20.0244
1663.4	-20.3957	-20.5144	-20.0111
1663.44	-20.3936	-20.5155	-20.0134
1663.48	-20.4006	-20.5119	-20.0082
1663.52	-20.4007	-20.5192	-20.0058
1663.56	-20.3909	-20.5143	-19.9932
1663.6	-20.3758	-20.5063	-19.9805
1663.64	-20.3718	-20.5006	-19.9743
1663.68	-20.3666	-20.4968	-19.9727
1663.72	-20.3625	-20.4954	-19.9688
1663.76	-20.3601	-20.4872	-19.9626
1663.8	-20.35	-20.4961	-19.9528
1663.84	-20.3434	-20.4955	-19.9474
1663.88	-20.3306	-20.4823	-19.9338
1663.92	-20.3238	-20.4857	-19.9305
1663.96	-20.3147	-20.4845	-19.9271
1664	-20.3074	-20.4804	-19.9246
1664.04	-20.3034	-20.4765	-19.9203
1664.08	-20.3006	-20.474	-19.9151
1664.12	-20.3002	-20.4736	-19.9136
1664.16	-20.2963	-20.4725	-19.9161
1664.2	-20.292	-20.471	-19.9133
1664.24	-20.2889	-20.4681	-19.9174
1664.28	-20.2904	-20.4729	-19.9179
1664.32	-20.294	-20.4638	-19.9175
1664.36	-20.2866	-20.4559	-19.9148
1664.4	-20.2787	-20.4562	-19.9094
1664.44	-20.2746	-20.457	-19.9085
1664.48	-20.2703	-20.457	-19.9084
1664.52	-20.271	-20.4599	-19.9116
1664.56	-20.2638	-20.4557	-19.911
1664.6	-20.2596	-20.4542	-19.9135
1664.64	-20.257	-20.4494	-19.9116
1664.68	-20.2636	-20.4486	-19.9129
1664.72	-20.261	-20.4461	-19.9196
1664.76	-20.2622	-20.4481	-19.9242
1664.8	-20.263	-20.4418	-19.9223
1664.84	-20.252	-20.4387	-19.9222
1664.88	-20.2444	-20.4315	-19.9174
1664.92	-20.2316	-20.4172	-19.9113
1664.96	-20.2248	-20.4086	-19.9121
1665	-20.2186	-20.4057	-19.9186
1665.04	-20.2175	-20.4034	-19.9178
1665.08	-20.2091	-20.3991	-19.9164
1665.12	-20.2014	-20.3907	-19.917
1665.16	-20.193	-20.3821	-19.9159
1665.2	-20.1848	-20.3772	-19.9187
1665.24	-20.1845	-20.3686	-19.9257
1665.28	-20.182	-20.3621	-19.9294
1665.32	-20.1767	-20.3616	-19.9328
1665.36	-20.1741	-20.3589	-19.9351
1665.4	-20.1684	-20.3429	-19.9342
1665.44	-20.1664	-20.3391	-19.9305
1665.48	-20.1637	-20.3349	-19.9275
1665.52	-20.1587	-20.3325	-19.945
1665.56	-20.1581	-20.3301	-19.9532
1665.6	-20.1561	-20.3267	-19.9561
1665.64	-20.1587	-20.3252	-19.9665
1665.68	-20.1498	-20.3191	-19.9753
1665.72	-20.1438	-20.3148	-19.9813
1665.76	-20.1487	-20.3207	-19.9943
1665.8	-20.1441	-20.3142	-19.9979
1665.84	-20.1425	-20.3121	-20.0066
1665.88	-20.1385	-20.3107	-20.0141
1665.92	-20.1376	-20.3128	-20.0313
1665.96	-20.134	-20.3061	-20.0407
1666	-20.1321	-20.3106	-20.0493
1666.04	-20.131	-20.3048	-20.056
1666.08	-20.1262	-20.298	-20.0609
1666.12	-20.1266	-20.2955	-20.0678
1666.16	-20.1304	-20.2902	-20.0734
1666.2	-20.137	-20.2942	-20.0835
1666.24	-20.1375	-20.2898	-20.0924
1666.28	-20.1391	-20.286	-20.1009
1666.32	-20.1417	-20.2813	-20.1098
1666.36	-20.145	-20.2797	-20.121
1666.4	-20.1501	-20.277	-20.1336
1666.44	-20.1502	-20.2733	-20.1403
1666.48	-20.1535	-20.2669	-20.1525
1666.52	-20.1609	-20.2727	-20.168
1666.56	-20.1649	-20.2715	-20.1739
1666.6	-20.168	-20.2721	-20.1869
1666.64	-20.1705	-20.2778	-20.1966
1666.68	-20.1745	-20.2821	-20.2054
1666.72	-20.1774	-20.2848	-20.215
1666.76	-20.1751	-20.279	-20.224
1666.8	-20.176	-20.2745	-20.2284
1666.84	-20.1778	-20.277	-20.2403
1666.88	-20.1899	-20.2833	-20.2537
1666.92	-20.194	-20.2848	-20.2642
1666.96	-20.1984	-20.284	-20.275
1667	-20.2044	-20.2926	-20.2866
1667.04	-20.2113	-20.2878	-20.3017
1667.08	-20.2212	-20.2891	-20.3128
1667.12	-20.2243	-20.2887	-20.3277
1667.16	-20.2311	-20.2977	-20.3408
1667.2	-20.2461	-20.3096	-20.3598
1667.24	-20.2515	-20.3165	-20.3717
1667.28	-20.2569	-20.3291	-20.3814
1667.32	-20.2613	-20.3334	-20.392
1667.36	-20.2675	-20.3357	-20.3982
1667.4	-20.2767	-20.3399	-20.4083
1667.44	-20.2831	-20.343	-20.4182
1667.48	-20.2827	-20.348	-20.4296
1667.52	-20.2951	-20.3561	-20.4377
1667.56	-20.3034	-20.3639	-20.4519
1667.6	-20.3075	-20.3634	-20.4601
1667.64	-20.3121	-20.3648	-20.467
1667.68	-20.327	-20.3659	-20.4762
1667.72	-20.3402	-20.3714	-20.4877
1667.76	-20.3495	-20.3691	-20.4966
1667.8	-20.3557	-20.3759	-20.509
1667.84	-20.3634	-20.3818	-20.5227
1667.88	-20.3757	-20.3947	-20.5312
1667.92	-20.3838	-20.402	-20.5379
1667.96	-20.3936	-20.4092	-20.5483
1668	-20.4034	-20.4164	-20.5605
1668.04	-20.4116	-20.419	-20.5689
1668.08	-20.4228	-20.4274	-20.582
1668.12	-20.4283	-20.4268	-20.5902
1668.16	-20.4396	-20.4295	-20.5979
1668.2	-20.4502	-20.4377	-20.6091
1668.24	-20.4651	-20.4484	-20.6251
1668.28	-20.4751	-20.4564	-20.6349
1668.32	-20.4911	-20.468	-20.6521
1668.36	-20.5046	-20.4764	-20.6702
1668.4	-20.5189	-20.4769	-20.6852
1668.44	-20.5228	-20.4834	-20.6944
1668.48	-20.5323	-20.4921	-20.7064
1668.52	-20.5465	-20.4994	-20.724
1668.56	-20.557	-20.5046	-20.7366
1668.6	-20.5685	-20.5163	-20.7437
1668.64	-20.5766	-20.5243	-20.7525
1668.68	-20.5865	-20.533	-20.7642
1668.72	-20.5957	-20.5402	-20.7759
1668.76	-20.5994	-20.5453	-20.7836
1668.8	-20.6065	-20.552	-20.7963
1668.84	-20.621	-20.5612	-20.8128
1668.88	-20.6241	-20.5598	-20.8181
1668.92	-20.6361	-20.566	-20.8304
1668.96	-20.6471	-20.5758	-20.8454
1669	-20.6582	-20.5826	-20.8518
1669.04	-20.6671	-20.5889	-20.8643
1669.08	-20.6748	-20.5989	-20.8783
1669.12	-20.685	-20.6068	-20.8923
1669.16	-20.6951	-20.614	-20.906
1669.2	-20.7025	-20.621	-20.9175
1669.24	-20.7067	-20.6299	-20.9301
1669.28	-20.7208	-20.6394	-20.9449
1669.32	-20.7296	-20.6496	-20.962
1669.36	-20.7409	-20.6627	-20.9767
1669.4	-20.7574	-20.6768	-20.9976
1669.44	-20.7675	-20.6901	-21.0148
1669.48	-20.772	-20.6913	-21.0172
1669.52	-20.7784	-20.701	-21.0317
1669.56	-20.7871	-20.7089	-21.0482
1669.6	-20.8027	-20.7172	-21.0713
1669.64	-20.8173	-20.7275	-21.0897
1669.68	-20.8258	-20.7381	-21.1048
1669.72	-20.8366	-20.7473	-21.122
1669.76	-20.846	-20.7557	-21.1381
1669.8	-20.8551	-20.7674	-21.157
1669.84	-20.8712	-20.7765	-21.1818
1669.88	-20.8846	-20.7856	-21.2023
1669.92	-20.8936	-20.7947	-21.2191
1669.96	-20.9047	-20.802	-21.2374
1670	-20.9172	-20.805	-21.256
1670.04	-20.9289	-20.8147	-21.2727
1670.08	-20.9379	-20.822	-21.2892
1670.12	-20.9547	-20.8383	-21.3207
1670.16	-20.9679	-20.8512	-21.3473
1670.2	-20.982	-20.8616	-21.3722
1670.24	-20.9878	-20.8669	-21.3943
1670.28	-20.9943	-20.8744	-21.4143
1670.32	-20.9974	-20.8802	-21.4359
1670.36	-21.0045	-20.8931	-21.4566
1670.4	-21.0122	-20.9018	-21.4749
1670.44	-21.0267	-20.904	-21.5008
1670.48	-21.0369	-20.9102	-21.5205
1670.52	-21.045	-20.9128	-21.5404
1670.56	-21.0518	-20.9173	-21.5575
1670.6	-21.0611	-20.925	-21.5761
1670.64	-21.0702	-20.9317	-21.5929
1670.68	-21.0791	-20.9384	-21.6123
1670.72	-21.087	-20.9462	-21.6325
1670.76	-21.0974	-20.951	-21.6553
1670.8	-21.1029	-20.9558	-21.6763
1670.84	-21.1152	-20.967	-21.6923
1670.88	-21.1298	-20.9745	-21.7098
1670.92	-21.1396	-20.9843	-21.7339
1670.96	-21.155	-20.9995	-21.759
1671	-21.1665	-21.0155	-21.783
1671.04	-21.1784	-21.0245	-21.8111
1671.08	-21.1904	-21.037	-21.8403
1671.12	-21.2091	-21.0448	-21.8709
1671.16	-21.2218	-21.0551	-21.8996
1671.2	-21.2336	-21.065	-21.9273
1671.24	-21.252	-21.0755	-21.953
1671.28	-21.2638	-21.0933	-21.9732
1671.32	-21.2782	-21.1089	-21.9975
1671.36	-21.291	-21.1194	-22.0226
1671.4	-21.2982	-21.1286	-22.0502
1671.44	-21.3151	-21.1512	-22.0826
1671.48	-21.3301	-21.1655	-22.1192
1671.52	-21.3431	-21.1775	-22.1524
1671.56	-21.3586	-21.1867	-22.1783
1671.6	-21.3666	-21.195	-22.1982
1671.64	-21.3796	-21.2079	-22.2288
1671.68	-21.3932	-21.2178	-22.2583
1671.72	-21.4102	-21.2294	-22.2842
1671.76	-21.4357	-21.2483	-22.3176
1671.8	-21.4429	-21.2504	-22.3389
1671.84	-21.4604	-21.2669	-22.3724
1671.88	-21.4756	-21.2745	-22.4005
1671.92	-21.4943	-21.2874	-22.4289
1671.96	-21.512	-21.2934	-22.455
1672	-21.5264	-21.306	-22.4826
1672.04	-21.5425	-21.3157	-22.5023
1672.08	-21.56	-21.3219	-22.5316
1672.12	-21.5709	-21.3334	-22.5556
1672.16	-21.5862	-21.3379	-22.58
1672.2	-21.6033	-21.3539	-22.6099
1672.24	-21.6178	-21.3682	-22.6391
1672.28	-21.6386	-21.3844	-22.6768
1672.32	-21.6576	-21.4039	-22.7124
1672.36	-21.6781	-21.4223	-22.7484
1672.4	-21.6928	-21.4365	-22.7797
1672.44	-21.7094	-21.4565	-22.8047
1672.48	-21.7264	-21.4729	-22.8349
1672.52	-21.7434	-21.4924	-22.8661
1672.56	-21.7562	-21.5036	-22.8913
1672.6	-21.7708	-21.5152	-22.9232
1672.64	-21.7877	-21.5297	-22.9534
1672.68	-21.8161	-21.5511	-22.9927
1672.72	-21.834	-21.5674	-23.025
1672.76	-21.8529	-21.5831	-23.0572
1672.8	-21.879	-21.6072	-23.0893
1672.84	-21.8916	-21.6227	-23.1231
1672.88	-21.9115	-21.6371	-23.1497
1672.92	-21.9264	-21.6484	-23.1792
1672.96	-21.9475	-21.6666	-23.2097
1673	-21.9664	-21.6889	-23.2422
1673.04	-21.9806	-21.7004	-23.2713
1673.08	-21.9986	-21.7273	-23.3038
1673.12	-22.0202	-21.7547	-23.3441
1673.16	-22.043	-21.7819	-23.3801
1673.2	-22.0654	-21.8028	-23.4119
1673.24	-22.0789	-21.8134	-23.4339
1673.28	-22.1008	-21.826	-23.4648
1673.32	-22.1219	-21.8443	-23.4961
1673.36	-22.1368	-21.8559	-23.5211
1673.4	-22.1567	-21.8745	-23.5548
1673.44	-22.1761	-21.8946	-23.5909
1673.48	-22.2012	-21.9144	-23.6244
1673.52	-22.2331	-21.9313	-23.6611
1673.56	-22.2496	-21.9485	-23.7008
1673.6	-22.267	-21.9692	-23.7361
1673.64	-22.291	-21.989	-23.768
1673.68	-22.3181	-22.0059	-23.8045
1673.72	-22.3419	-22.0216	-23.8352
1673.76	-22.3666	-22.0465	-23.8685
1673.8	-22.3897	-22.068	-23.9044
1673.84	-22.4219	-22.0916	-23.9338
1673.88	-22.4466	-22.111	-23.9616
1673.92	-22.4673	-22.1231	-23.9984
1673.96	-22.4996	-22.1486	-24.043
1674	-22.5246	-22.1636	-24.0833
1674.04	-22.5454	-22.1822	-24.1194
1674.08	-22.5702	-22.2059	-24.1572
1674.12	-22.5942	-22.2254	-24.1963
1674.16	-22.6142	-22.247	-24.234
1674.2	-22.6382	-22.2773	-24.2795
1674.24	-22.6644	-22.2996	-24.3201
1674.28	-22.6893	-22.3227	-24.356
1674.32	-22.7153	-22.3424	-24.3968
1674.36	-22.7375	-22.3593	-24.4229
1674.4	-22.76	-22.3827	-24.4602
1674.44	-22.7857	-22.4111	-24.4949
1674.48	-22.8182	-22.4347	-24.5351
1674.52	-22.8471	-22.4628	-24.5753
1674.56	-22.8691	-22.4835	-24.6108
1674.6	-22.896	-22.5075	-24.6554
1674.64	-22.9206	-22.5265	-24.6994
1674.68	-22.9517	-22.5537	-24.7455
1674.72	-22.9804	-22.5793	-24.7872
1674.76	-23.0115	-22.606	-24.8307
1674.8	-23.0376	-22.6309	-24.8708
1674.84	-23.0761	-22.6479	-24.9121
1674.88	-23.0993	-22.6728	-24.9537
1674.92	-23.1269	-22.7002	-24.9894
1674.96	-23.1591	-22.7331	-25.0338
1675	-23.1887	-22.756	-25.0698
1675.04	-23.2214	-22.7801	-25.1165
1675.08	-23.2482	-22.8011	-25.1513
1675.12	-23.2776	-22.8244	-25.1927
1675.16	-23.3119	-22.8526	-25.2382
1675.2	-23.3439	-22.8818	-25.2848
1675.24	-23.3702	-22.9097	-25.332
1675.28	-23.4094	-22.9367	-25.3814
1675.32	-23.442	-22.9587	-25.4281
1675.36	-23.4797	-22.9878	-25.4739
1675.4	-23.5112	-23.0146	-25.5209
1675.44	-23.5368	-23.0352	-25.5582
1675.48	-23.5708	-23.062	-25.6059
1675.52	-23.6029	-23.0908	-25.6588
1675.56	-23.6362	-23.1183	-25.7092
1675.6	-23.6841	-23.1595	-25.7717
1675.64	-23.7151	-23.1838	-25.817
1675.68	-23.7469	-23.2065	-25.8622
1675.72	-23.7809	-23.2309	-25.908
1675.76	-23.8171	-23.2554	-25.954
1675.8	-23.8485	-23.2766	-25.994
1675.84	-23.882	-23.3059	-26.0397
1675.88	-23.9176	-23.3369	-26.0882
1675.92	-23.9446	-23.3622	-26.1298
1675.96	-23.9772	-23.386	-26.1722
1676	-24.0131	-23.4149	-26.2186
1676.04	-24.0478	-23.4437	-26.2642
1676.08	-24.0817	-23.474	-26.3133
1676.12	-24.1206	-23.5044	-26.3632
1676.16	-24.1468	-23.5273	-26.4014
1676.2	-24.1768	-23.5459	-26.4364
1676.24	-24.2059	-23.5708	-26.4733
1676.28	-24.2438	-23.6	-26.5139
1676.32	-24.2832	-23.6274	-26.5627
1676.36	-24.3196	-23.6549	-26.6037
1676.4	-24.3583	-23.6865	-26.6428
1676.44	-24.3924	-23.716	-26.6796
1676.48	-24.428	-23.7488	-26.7182
1676.52	-24.4656	-23.7856	-26.7573
1676.56	-24.5039	-23.8189	-26.7989
1676.6	-24.5432	-23.8524	-26.8407
1676.64	-24.5801	-23.8839	-26.8757
1676.68	-24.6177	-23.9171	-26.9153
1676.72	-24.656	-23.9502	-26.9548
1676.76	-24.6974	-23.9836	-26.99
1676.8	-24.7347	-24.0214	-27.0226
1676.84	-24.7764	-24.0581	-27.0568
1676.88	-24.8102	-24.0881	-27.0992
1676.92	-24.8474	-24.1185	-27.1365
1676.96	-24.8845	-24.1533	-27.1715
1677	-24.9218	-24.1812	-27.208
1677.04	-24.9645	-24.2131	-27.2448
1677.08	-25.006	-24.2468	-27.2769
1677.12	-25.0398	-24.2717	-27.3096
1677.16	-25.0758	-24.3057	-27.3393
1677.2	-25.1141	-24.3386	-27.3716
1677.24	-25.1541	-24.374	-27.4021
1677.28	-25.1936	-24.4123	-27.4363
1677.32	-25.2334	-24.4432	-27.4686
1677.36	-25.2698	-24.4711	-27.4984
1677.4	-25.3088	-24.5052	-27.5266
1677.44	-25.3508	-24.5407	-27.5517
1677.48	-25.383	-24.5719	-27.5678
1677.52	-25.4182	-24.6047	-27.584
1677.56	-25.4546	-24.6375	-27.6069
1677.6	-25.4909	-24.6762	-27.6313
1677.64	-25.5294	-24.7092	-27.6552
1677.68	-25.5676	-24.7438	-27.6786
1677.72	-25.6091	-24.781	-27.6977
1677.76	-25.6433	-24.8129	-27.7171
1677.8	-25.6718	-24.836	-27.7333
1677.84	-25.7081	-24.868	-27.7515
1677.88	-25.7427	-24.8953	-27.7645
1677.92	-25.7734	-24.9341	-27.7802
1677.96	-25.811	-24.9681	-27.7968
1678	-25.846	-25.0025	-27.8037
1678.04	-25.8842	-25.0402	-27.8103
1678.08	-25.9162	-25.0718	-27.8295
1678.12	-25.9497	-25.1146	-27.8421
1678.16	-25.9884	-25.1498	-27.8565
1678.2	-26.0198	-25.1936	-27.8718
1678.24	-26.0566	-25.2289	-27.8854
1678.28	-26.0919	-25.2635	-27.8938
1678.32	-26.1224	-25.2985	-27.896
1678.36	-26.1489	-25.3301	-27.8998
1678.4	-26.1802	-25.3574	-27.9005
1678.44	-26.2193	-25.3963	-27.9078
1678.48	-26.2479	-25.4273	-27.9133
1678.52	-26.2799	-25.4621	-27.916
1678.56	-26.3105	-25.4923	-27.9171
1678.6	-26.3403	-25.5278	-27.9131
1678.64	-26.374	-25.5678	-27.9128
1678.68	-26.4008	-25.5974	-27.9095
1678.72	-26.4268	-25.6197	-27.9027
1678.76	-26.4523	-25.6468	-27.8993
1678.8	-26.4793	-25.6824	-27.8867
1678.84	-26.5031	-25.7125	-27.8814
1678.88	-26.5316	-25.7475	-27.8736
1678.92	-26.5568	-25.781	-27.8695
1678.96	-26.5826	-25.8128	-27.8586
1679	-26.606	-25.84	-27.8498
1679.04	-26.631	-25.8722	-27.8353
1679.08	-26.6577	-25.9036	-27.8235
1679.12	-26.6819	-25.9334	-27.8012
1679.16	-26.7008	-25.9529	-27.7822
1679.2	-26.7286	-25.9814	-27.7519
1679.24	-26.7465	-26.0054	-27.737
1679.28	-26.7608	-26.0361	-27.726
1679.32	-26.7774	-26.0678	-27.7117
1679.36	-26.7962	-26.0913	-27.6989
1679.4	-26.8216	-26.1285	-27.6862
1679.44	-26.8405	-26.1556	-27.6711
1679.48	-26.8604	-26.1836	-27.6538
1679.52	-26.8769	-26.2109	-27.6396
1679.56	-26.897	-26.2382	-27.6229
1679.6	-26.9151	-26.2632	-27.6025
1679.64	-26.9391	-26.2927	-27.5847
1679.68	-26.9561	-26.3211	-27.5659
1679.72	-26.9737	-26.3515	-27.5499
1679.76	-26.9892	-26.3831	-27.5361
1679.8	-27.004	-26.4104	-27.5218
1679.84	-27.0187	-26.4322	-27.5042
1679.88	-27.0229	-26.4476	-27.491
1679.92	-27.0338	-26.4735	-27.4832
[truncated: 13,002 more rows]
